# Supplementary material for: Effects of exogenous calcium on flavonoid biosynthesis and accumulation in peanut roots under salt stress through multi-omics
Source: Front Nutr. 2024 Oct 30;11:1434170. doi: 10.3389/fnut.2024.1434170 (PMC11557398; doi:10.3389/fnut.2024.1434170)
Supplement: Supplementary file 1 [file Table_1.XLSX]

## Sheet: Sheet1
Table S1. Primary and secondary metabolites in peanut roots treated for 48 hours were identified by extensive targeted metabolomics.
Compounds	Q1 (Da)	Q3 (Da)	Molecular Weight (Da)	Formula	Ionization model	Class	CAS
Piperidine	86.1	69.2	85.089	C5H11N	[M+H]+	Alkaloids	110-89-4
Pyruvic acid	87.01	43	88.016	C3H4O3	[M-H]-	Organic acids	127-17-3
Putrescine	89.11	72.08	88.1	C4H12N2	[M+H]+	Alkaloids	110-60-1
Oxalic acid	88.99	70.9	89.995	C2H2O4	[M-H]-	Organic acids	144-62-7
3-Hydroxypropanoic acid	89	59	90.032	C3H6O3	[M-H]-	Organic acids	503-66-2
3-Hydroxypyridine*	96.04	68.05	95.037	C5H5NO	[M+H]+	Alkaloids	109-00-2
4-Hydroxypyridine*	96.04	68.05	95.037	C5H5NO	[M+H]+	Alkaloids	626-64-2
1-Aminocyclopropane-1-carboxylic acid	102.05	56.05	101.048	C4H7NO2	[M+H]+	Organic acids	22059-21-8
3-Methyl-1-pentanol	101.1	84.7	102.104	C6H14O	[M-H]-	Others	589-35-5
Cadaverine	103.12	86.1	102.116	C5H14N2	[M+H]+	Alkaloids	462-94-2
N,N-Dimethylglycine	104.07	86	103.063	C4H9NO2	[M+H]+	Amino acids and derivatives	1118-68-9
2-Aminoisobutyric acid*	104.07	58	103.063	C4H9NO2	[M+H]+	Organic acids	62-57-7
γ-Aminobutyric acid*	104.07	68.8	103.063	C4H9NO2	[M+H]+	Organic acids	56-12-2
Choline	104.1	60.1	103.091	C5H13NO	[M+H]+	Alkaloids	62-49-7
Hydroxypyruvic acid*	103	59.01	104.011	C3H4O4	[M-H]-	Organic acids	1113-60-6
Tartronate semialdehyde*	103	59.01	104.011	C3H4O4	[M-H]-	Organic acids	2480-77-5
Malonic acid	103	59	104.06	C3H4O4	[M-H]-	Organic acids	141-82-2
L-Serine	106	60	105.043	C3H7NO3	[M+H]+	Amino acids and derivatives	56-45-1
Diethanolamine	106.09	88	105.079	C4H11NO2	[M+H]+	Alkaloids	111-42-2
Pyrrole-2-carboxylic acid	110.02	66	111.032	C5H5NO2	[M-H]-	Organic acids	634-97-9
Cytosine	112.05	95	111.043	C4H5N3O	[M+H]+	Nucleotides and derivatives	71-30-7
Isocytosine	112.05	70.03	111.043	C4H5N3O	[M+H]+	Nucleotides and derivatives	108-53-2
Histamine	112.09	95	111.08	C5H9N3	[M+H]+	Alkaloids	51-45-6
Uracil	111.02	80	112.027	C4H4N2O2	[M-H]-	Nucleotides and derivatives	66-22-8
L-Proline	116.07	70.1	115.063	C5H9NO2	[M+H]+	Amino acids and derivatives	147-85-3
4-Oxopentanoic Acid	115.05	97	116.047	C5H8O3	[M]-	Organic acids	123-76-2
N-Acetyl-L-glycine	116.04	74	117.043	C4H7NO3	[M-H]-	Amino acids and derivatives	543-24-8
Indole	118.07	91	117.058	C8H7N	[M+H]+	Alkaloids	120-72-9
Betaine	118.09	59	117.079	C5H11NO2	[M+H]+	Alkaloids	107-43-7
N-Methyl-α-aminoisobutyric acid	235.16	118.09	117.079	C5H11NO2	[2M+H]+	Amino acids and derivatives	2566-34-9
5-Aminovaleric acid	118.09	101	117.079	C5H11NO2	[M+H]+	Organic acids	660-88-8
L-Valine	118.09	72.1	117.079	C5H11NO2	[M+H]+	Amino acids and derivatives	72-18-4
Methylmalonic acid*	117.02	73	118.027	C4H6O4	[M-H]-	Organic acids	516-05-2
Succinic acid*	117.02	73	118.027	C4H6O4	[M-H]-	Organic acids	110-15-6
D-Erythronolactone	117	59	118.027	C4H6O4	[M-H]-	Organic acids	15667-21-7
β-Hydroxyisovaleric acid	117.06	59	118.063	C5H10O3	[M-H]-	Organic acids	625-08-1
Aminomalonic acid	118	74	119.022	C3H5NO4	[M-H]-	Organic acids	1068-84-4
L-Threonine	120.07	74	119.058	C4H9NO3	[M+H]+	Amino acids and derivatives	72-19-5
L-Homoserine	120.07	74.1	119.058	C4H9NO3	[M+H]+	Amino acids and derivatives	672-15-1
D-(-)-Threose	121.04	93.06	120.042	C4H8O4	[M+H]+	Others	95-43-2
L-Cysteine	120.02	62	121.02	C3H7NO2S	[M-H]-	Amino acids and derivatives	52-90-4
Benzamide	122	105	121.053	C7H7NO	[M+H]+	Phenolic acids	55-21-0
4-Hydroxybenzaldehyde	121.03	92	122.037	C7H6O2	[M-H]-	Phenolic acids	123-08-0
Nicotinamide	123.06	80.05	122.048	C6H6N2O	[M+H]+	Others	98-92-0
D-Threitol	121	59	122.058	C4H10O4	[M-H]-	Others	2418-52-2
Isonicotinic acid*	124.04	78.03	123.032	C6H5NO2	[M+H]+	Others	55-22-1
2-Picolinic acid	122.03	78	123.032	C6H5NO2	[M-H]-	Organic acids	98-98-6
Nicotinic acid (Vitamin B3)*	124.04	78	123.032	C6H5NO2	[M+H]+	Others	59-67-6
1,3,5-Benzenetriol	127.04	81.03	126.032	C6H6O3	[M+H]+	Phenolic acids	108-73-6
5-Hydroxymethylfurfural	127.04	53.04	126.032	C6H6O3	[M+H]+	Others	67-47-0
Thymine	127.05	110	126.043	C5H6N2O2	[M+H]+	Nucleotides and derivatives	65-71-4
Isoquinoline	130.06	103.05	129.058	C9H7N	[M+H]+	Alkaloids	119-65-3
Cycloleucine	130.09	84.08	129.079	C6H11NO2	[M+H]+	Amino acids and derivatives	52-52-8
Pipecolic acid	130.09	84.08	129.079	C6H11NO2	[M+H]+	Organic acids	4043-87-2
4-Guanidinobutanal	130.09	84.08	129.09	C5H11N3O	[M+H]+	Others	-
Methylenesuccinic acid	129.02	85.03	130.027	C5H6O4	[M-H]-	Organic acids	97-65-4
N-Acetylputrescine	131.12	114.09	130.111	C6H14N2O	[M+H]+	Alkaloids	18233-70-0
Agmatine	131.13	114.1	130.122	C5H14N4	[M+H]+	Alkaloids	306-60-5
N-acetyl-beta-alanine	130.05	58.03	131.058	C5H9NO3	[M-H]-	Amino acids and derivatives	3025-95-4
5-Aminolevulinate	132.1	86.1	131.058	C5H9NO3	[M+H]+	Alkaloids	106-60-5
Trans-4-Hydroxy-L-proline	132.07	86	131.058	C5H9NO3	[M+H]+	Amino acids and derivatives	51-35-4
3-Guanidinopropionic acid	130.05	88.04	131.069	C4H9N3O2	[M-H]-	Organic acids	353-09-3
6-Deoxyfagomine	132.1	57.1	131.095	C6H13NO2	[M+H]+	Alkaloids	197449-09-5
L-Isoleucine*	132.1	86	131.095	C6H13NO2	[M+H]+	Amino acids and derivatives	73-32-5
L-Leucine*	132.1	86.2	131.095	C6H13NO2	[M+H]+	Amino acids and derivatives	61-90-5
6-Aminocaproic acid	132.1	69	131.095	C6H13NO2	[M+H]+	Organic acids	60-32-2
L-Norleucine*	132.1	86	131.095	C6H13NO2	[M+H]+	Amino acids and derivatives	327-57-1
Glutaric acid*	131.03	87.05	132.042	C5H8O4	[M-H]-	Organic acids	110-94-1
Monomethyl succinate*	131.03	87.05	132.042	C5H8O4	[M-H]-	Organic acids	3878-55-5
2-Methylsuccinic acid*	131.03	87.05	132.042	C5H8O4	[M-H]-	Organic acids	498-21-5
3-Ureidopropionic Acid	131.05	70.03	132.053	C4H8N2O3	[M-H]-	Organic acids	462-88-4
L-Asparagine	133.06	74	132.054	C4H8N2O3	[M+H]+	Amino acids and derivatives	70-47-3
2-Hydroxyisocaproic acid	131.07	85	132.079	C6H12O3	[M-H]-	Organic acids	20312-37-2
6-Hydroxyhexanoic acid	131.07	85	132.079	C6H12O3	[M-H]-	Organic acids	1191-25-9
L-Ornithine	133	116	132.09	C5H12N2O2	[M+H]+	Amino acids and derivatives	70-26-8
L-Aspartic Acid	132.03	88	133.038	C4H7NO4	[M-H]-	Amino acids and derivatives	56-84-8
L-Malic acid	133.01	71.01	134.022	C4H6O5	[M-H]-	Organic acids	97-67-6
3-Dehydro-L-Threonic Acid	133.01	71.01	134.022	C4H6O5	[M-H]-	Others	-
2,3-Dihydroxy-3-Methylbutanoic Acid	133.05	71.01	134.058	C5H10O4	[M-H]-	Organic acids	1756-18-9
S-Methyl-L-cysteine	136.04	91.05	135.035	C4H9NO2S	[M+H]+	Amino acids and derivatives	1187-84-4
2-Aminopurine	136.06	118.9	135.054	C5H5N5	[M+H]+	Nucleotides and derivatives	452-06-2
Adenine	136.06	119	135.054	C5H5N5	[M+H]+	Nucleotides and derivatives	73-24-5
N-benzylformamide	136.07	91.05	135.068	C8H9NO	[M+H]+	Alkaloids	6343-54-0
Allopurinol	137.05	110	136.039	C5H4N4O	[M+H]+	Nucleotides and derivatives	315-30-0
Hypoxanthine	137.05	119	136.039	C5H4N4O	[M+H]+	Nucleotides and derivatives	68-94-0
Phenyl acetate	135.05	92.03	136.052	C8H8O2	[M-H]-	Phenolic acids	122-79-2
4'-Hydroxyacetophenone	135.05	92.03	136.052	C8H8O2	[M-H]-	Phenolic acids	99-93-4
Anthranilic Acid	138.05	92.1	137.048	C7H7NO2	[M+H]+	Phenolic acids	118-92-3
Nicotinic Acid Methyl Ester(Methyl Nicotinate)	138.05	78	137.048	C7H7NO2	[M+H]+	Alkaloids	93-60-7
Trigonelline	138.05	94.07	137.048	C7H7NO2	[M+H]+	Alkaloids	535-83-1
4-Aminobenzoic acid	138.06	120	137.048	C7H7NO2	[M+H]+	Phenolic acids	150-13-0
Phenylethanolamine	138.09	121.1	137.084	C8H11NO	[M+H]+	Alkaloids	7568-93-6
L-Tyramine	138.09	103	137.084	C8H11NO	[M+H]+	Amino acids and derivatives	51-67-2
3-Hydroxybenzoic Acid	137.02	93.03	138.032	C7H6O3	[M-H]-	Organic acids	99-06-9
Salicylic acid	137.03	108.02	138.032	C7H6O3	[M-H]-	Phenolic acids	69-72-7
Protocatechualdehyde	137.02	93.04	138.032	C7H6O3	[M-H]-	Phenolic acids	139-85-5
4-Hydroxybenzoic acid	137.02	93	138.032	C7H6O3	[M-H]-	Phenolic acids	99-96-7
Tyrosol	137.06	119.05	138.068	C8H10O2	[M-H]-	Phenolic acids	501-94-0
2-Phenoxyethanol	139.08	56.96	138.068	C8H10O2	[M+H]+	Phenolic acids	122-99-6
6-Hydroxynicotinic acid	140.03	94	139.027	C6H5NO3	[M+H]+	Alkaloids	5006-66-6
4-Nitrophenol	140	99	139.027	C6H5NO3	[M+H]+	Phenolic acids	100-02-7
Methyl 3-aminopropanoate	104.07	59.01	139.04	C4H9NO2	[M-Cl]+	Amino acids and derivatives	3196-73-4
Coumalic acid	141.02	123	140.011	C6H4O4	[M+H]+	Phenolic acids	500-05-0
O-Phosphorylethanolamine	140.01	78.96	141.019	C2H8NO4P	[M-H]-	Alkaloids	1071-23-4
Histidinol	142.1	124.09	141.09	C6H11N3O	[M+H]+	Alkaloids	501-28-0
Muconic acid	141.02	59	142.027	C6H6O4	[M-H]-	Organic acids	1119-72-8
4-Methyl-5-thiazoleethanol	144.05	113.2	143.04	C6H9NOS	[M+H]+	Others	137-00-8
L-Cyclopentylglycine	144.1	98.09	143.095	C7H13NO2	[M+H]+	Amino acids and derivatives	2521-84-8
1-Methylpiperidine-2-carboxylic acid	144.1	84.08	143.095	C7H13NO2	[M+H]+	Organic acids	7730-87-2
1-Naphthol	143.05	115.06	144.058	C10H8O	[M-H]-	Phenolic acids	90-15-3
2-Naphthol	143.05	115.05	144.058	C10H8O	[M-H]-	Phenolic acids	135-19-3
Octanoic acid	143.11	143.11	144.115	C8H16O2	[M-H]-	Lipids	124-07-2
Indole-3-carboxaldehyde	146.06	91	145.053	C9H7NO	[M+H]+	Alkaloids	487-89-8
N-Hydroxypipecolic acid	146.08	70.06	145.074	C6H11NO3	[M+H]+	Alkaloids	115819-92-6
Allysine(6-Oxo DL-Norleucine)	144.1	126	145.074	C6H11NO3	[M-H]-	Amino acids and derivatives	1962-83-0
N-Methyl-Trans-4-Hydroxy-L-Proline	146.08	82.07	145.074	C6H11NO3	[M+H]+	Amino acids and derivatives	4252-82-8
4-Acetamidobutyric acid	146.08	86	145.074	C6H11NO3	[M+H]+	Organic acids	3025-96-5
4-Guanidinobutyric acid	146.09	87	145.085	C5H11N3O2	[M+H]+	Organic acids	463-00-3
α-Ketoglutaric acid	145.01	101	146.022	C5H6O5	[M-H]-	Organic acids	328-50-7
2-Methyl-3-oxosuccinic acid	145.01	57.03	146.022	C5H6O5	[M-H]-	Organic acids	-
2-Acetyl-2-Hydroxybutanoic Acid	145.05	83.05	146.058	C6H10O4	[M-H]-	Organic acids	-
Adipic Acid	145.05	101	146.058	C6H10O4	[M-H]-	Organic acids	124-04-9
2,2-Dimethylsuccinic acid	145.06	109.04	146.058	C6H10O4	[M-H]-	Organic acids	597-43-3
L-Glutamine	147.08	84	146.069	C5H10N2O3	[M+H]+	Amino acids and derivatives	56-85-9
L-Lysine	147.11	84	146.106	C6H14N2O2	[M+H]+	Amino acids and derivatives	56-87-1
Acetylcholine	147.13	87.2	146.118	C7H16NO2	[M+H]+	Alkaloids	60-31-1
L-Glutamic acid	148.06	84	147.053	C5H9NO4	[M+H]+	Amino acids and derivatives	56-86-0
O-Acetylserine	148.06	88	147.053	C5H9NO4	[M+H]+	Amino acids and derivatives	5147-00-2
L-threo-3-Methylaspartate	146.05	102.06	147.053	C5H9NO4	[M-H]-	Amino acids and derivatives	6061-13-8
(E)-Cinnamamide	148.08	103.06	147.068	C9H9NO	[M+H]+	Others	22031-64-7
4-Hydoxy-L-Isoleucine	148.1	74.02	147.09	C6H13NO3	[M+H]+	Amino acids and derivatives	781658-23-9
Phthalic anhydride	149.02	65.04	148.016	C8H4O3	[M+H]+	Phenolic acids	85-44-9
3-Methylmalic acid*	147.03	57.03	148.037	C5H8O5	[M-H]-	Organic acids	152204-30-3
L-Citramalic acid*	147.03	87.1	148.037	C5H8O5	[M-H]-	Organic acids	6236-09-5
2-Hydroxyglutaric Acid*	147.03	57.03	148.037	C5H8O5	[M-H]-	Organic acids	13095-48-2
2-Dehydro-3-deoxy-L-arabinonate	147.03	57.03	148.037	C5H8O5	[M-H]-	Others	-
D-Arabinono-1,4-lactone	147.03	85.03	148.037	C5H8O5	[M-H]-	Others	2782-09-4
p-Coumaraldehyde	147.05	129	148.052	C9H8O2	[M-H]-	Phenolic acids	2538-87-6
Cinnamic acid	147.05	77.01	148.052	C9H8O2	[M-H]-	Phenolic acids	140-10-3
4-Hydroxymandelonitrile	150.06	61.01	149.048	C8H7NO2	[M+H]+	Alkaloids	13093-65-7
DL-Methionine	150.1	61	149.051	C5H11NO2S	[M+H]+	Amino acids and derivatives	59-51-8
L-Methionine	150.06	61	149.051	C5H11NO2S	[M+H]+	Amino acids and derivatives	63-68-3
1-Methyladenine	150.08	133	149.07	C6H7N5	[M+H]+	Nucleotides and derivatives	5142-22-3
L-Tartaric acid	149.01	87	150.016	C4H6O6	[M-H]-	Organic acids	87-69-4
D-Arabinose*	149.05	59.01	150.053	C5H10O5	[M-H]-	Others	10323-20-3
L-Xylose*	149.05	59.02	150.053	C5H10O5	[M-H]-	Others	609-06-3
D-Ribose*	149.05	75.01	150.053	C5H10O5	[M-H]-	Others	50-69-1
Benzyl acetate	149.06	74.9	150.068	C9H10O2	[M-H]-	Organic acids	140-11-4
p-Coumaryl alcohol	149.06	131	150.068	C9H10O2	[M-H]-	Phenolic acids	3690-05-9
Isoguanine	152.06	135	151.049	C5H5N5O	[M+H]+	Nucleotides and derivatives	3373-53-3
Guanine	152.06	135	151.049	C5H5N5O	[M+H]+	Nucleotides and derivatives	73-40-5
Xanthine	151.03	151	152.033	C5H4N4O2	[M-H]-	Nucleotides and derivatives	69-89-6
8-Azaguanine	153.05	136.03	152.045	C4H4N6O	[M+H]+	Nucleotides and derivatives	134-58-7
2-Hydroxyphenylacetic acid	151.04	107.05	152.047	C8H8O3	[M-H]-	Organic acids	614-75-5
Phenoxyacetic acid	151.04	93.03	152.047	C8H8O3	[M-H]-	Phenolic acids	122-59-8
Methyl 4-hydroxybenzoate	151.04	136.02	152.047	C8H8O3	[M-H]-	Organic acids	99-76-3
O-Anisic acid (2-Methoxybenzoic acid)	151.04	93	152.047	C8H8O3	[M-H]-	Phenolic acids	529-75-9
Isovanillin	153.05	65.04	152.047	C8H8O3	[M+H]+	Phenolic acids	621-59-0
3-Methoxybenzoic acid	151.04	107.05	152.047	C8H8O3	[M-H]-	Phenolic acids	586-38-9
Vanillin	151.04	136	152.047	C8H8O3	[M-H]-	Phenolic acids	121-33-5
1-Methyl-6-Oxo-1,6-Dihydropyridine-3-Carboxamide	153.07	108.04	152.059	C7H8N2O2	[M+H]+	Alkaloids	701-44-0
D-Arabitol	151.06	71	152.068	C5H12O5	[M-H]-	Others	488-82-4
cis-Citral	153.13	83.05	152.12	C10H16O	[M+H]+	Organic acids	5392-40-5
3-Hydroxyanthranilic acid	154.05	136.04	153.043	C7H7NO3	[M+H]+	Alkaloids	548-93-6
2,3-Dihydroxybenzoic Acid*	153.02	109.03	154.027	C7H6O4	[M-H]-	Phenolic acids	303-38-8
2,5-Dihydroxybenzoic acid; Gentisic Acid*	153.02	109.03	154.027	C7H6O4	[M-H]-	Phenolic acids	490-79-9
3,4-Dihydroxybenzoic acid (Protocatechuic acid)*	153.02	109.03	154.027	C7H6O4	[M-H]-	Phenolic acids	99-50-3
L-Histidine	156.08	110	155.069	C6H9N3O2	[M+H]+	Amino acids and derivatives	71-00-1
2-Phosphoglycolate	154.98	78.8	155.982	C2H5O6P	[M-H]-	Organic acids	13147-57-4
3-Indoleacetonitrile	157	130	156.069	C10H8N2	[M+H]+	Alkaloids	771-51-7
L-Dihydroorotic Acid	157.03	70.03	158.033	C5H6N2O4	[M-H]-	Organic acids	5988-19-2
1-Decanol*	157.16	157.2	158.167	C10H22O	[M-H]-	Others	112-30-1
2-Decanol*	157.16	157.2	158.167	C10H22O	[M-H]-	Others	1120-06-5
5-Acetamidopentanoic Acid	158.08	116.07	159.09	C7H13NO3	[M-H]-	Organic acids	1072-10-2
δ-Guanidinovaleric acid	160.11	114.04	159.101	C6H13N3O2	[M+H]+	Organic acids	462-93-1
2-Oxoadipic acid	159.1	87	160.037	C6H8O5	[M-H]-	Organic acids	3184-35-8
6-MethylCoumarin	161.06	115	160.052	C10H8O2	[M+H]+	Lignans and Coumarins	92-48-8
2-Propylsuccinic acid*	159.07	97.07	160.074	C7H12O4	[M-H]-	Organic acids	618-57-5
Pimelic acid*	159.07	97.06	160.074	C7H12O4	[M-H]-	Organic acids	111-16-0
Daminozide	161.09	143.08	160.085	C6H12N2O3	[M+H]+	Alkaloids	1596-84-5
Tryptamine	161.11	144	160.1	C10H12N2	[M+H]+	Alkaloids	61-54-1
2,4-Dihydroxyquinoline	162.06	116.05	161.048	C9H7NO2	[M+H]+	Alkaloids	86-95-3
Indole-5-carboxylic acid*	160.04	116	161.048	C9H7NO2	[M-H]-	Alkaloids	1670-81-1
Indole-3-carboxylic acid*	160.04	116	161.048	C9H7NO2	[M-H]-	Alkaloids	771-50-6
N-Acetyl-L-threonine	160.06	98	161.069	C6H11NO4	[M-H]-	Amino acids and derivatives	17093-74-2
DL-2-Aminoadipic acid	162.08	98	161.069	C6H11NO4	[M+H]+	Alkaloids	542-32-5
Tryptophol	160.08	130.07	161.084	C10H11NO	[M-H]-	Alkaloids	526-55-6
7-Hydroxycoumarin	161.02	133.03	162.032	C9H6O3	[M-H]-	Lignans and Coumarins	93-35-6
1,6-anhydro-β-D-glucose	161.05	71.01	162.053	C6H10O5	[M-H]-	Others	498-07-7
3-Hydroxy-3-methylpentane-1,5-dioic acid	161.05	99	162.053	C6H10O5	[M-H]-	Amino acids and derivatives	503-49-1
4-MethoxycinnaMaldehyde	163.08	91.1	162.068	C10H10O2	[M+H]+	Phenolic acids	1963-36-6
4-Hydroxy-L-glutamic acid	162.04	144	163.048	C5H9NO5	[M-H]-	Amino acids and derivatives	3913-68-6
L-Homomethionine	164.07	56.05	163.067	C6H13NO2S	[M+H]+	Amino acids and derivatives	25148-30-5
L-Methionine methyl ester	164.07	104	163.067	C6H13NO2S	[M+H]+	Amino acids and derivatives	10332-17-9
2-Hydroxycinnamic acid*	163.04	119.05	164.047	C9H8O3	[M-H]-	Phenolic acids	583-17-5
3-Hydroxycinnamic Acid*	163.04	119.05	164.047	C9H8O3	[M-H]-	Phenolic acids	14755-02-3
p-Coumaric acid	165.05	119	164.047	C9H8O3	[M+H]+	Phenolic acids	501-98-4
Phenylpyruvic acid	163.04	91	164.047	C9H8O3	[M-H]-	Organic acids	156-06-9
(E)-3-(3,4-dihydroxyphenyl)acrylaldehyde	165.05	91.05	164.047	C9H8O3	[M+H]+	Phenolic acids	-
4-Phenylbutyric acid	165.09	91.05	164.084	C10H12O2	[M+H]+	Organic acids	1821-12-1
Cis-Jasmone	163.11	148.06	164.12	C11H16O	[M-H]-	Others	488-10-8
2-(Formylamino)benzoic acid	164.04	120	165.043	C8H7NO3	[M-H]-	Phenolic acids	3342-77-6
L-Methionine Sulfoxide	166.05	102	165.046	C5H11NO3S	[M+H]+	Amino acids and derivatives	3226-65-1
6-O-methylguanine*	166.07	124.05	165.065	C6H7N5O	[M+H]+	Nucleotides and derivatives	20535-83-5
7-Methylguanine*	166.07	149.05	165.065	C6H7N5O	[M+H]+	Nucleotides and derivatives	578-76-7
L-Phenylalanine	166.09	120.08	165.07	C9H11NO2	[M+H]+	Amino acids and derivatives	63-91-2
Terephthalic acid*	165.02	121.03	166.027	C8H6O4	[M-H]-	Phenolic acids	100-21-0
Phthalic acid*	165.02	77.04	166.027	C8H6O4	[M-H]-	Phenolic acids	88-99-3
6-Methylmercaptopurine	167.1	121.1	166.031	C6H6N4S	[M+H]+	Nucleotides and derivatives	50-66-8
D-Xylonic acid	165.04	75	166.048	C5H10O6	[M-H]-	Others	526-91-0
3-Methylxanthine	167.06	124	166.049	C6H6N4O2	[M+H]+	Nucleotides and derivatives	1076-22-8
7-Methylxanthine	167.06	150	166.049	C6H6N4O2	[M+H]+	Nucleotides and derivatives	552-62-5
2-Hydroxy-3-phenylpropanoic acid	165.06	103.06	166.063	C9H10O3	[M-H]-	Phenolic acids	7326-19-4
DL-3-Phenyllactic acid	165.06	119.05	166.063	C9H10O3	[M-H]-	Organic acids	828-01-3
2,6-Dimethoxybenzaldehyde	165.06	119.05	166.063	C9H10O3	[M-H]-	Phenolic acids	3392-97-0
3-(4-Hydroxyphenyl)-propionic acid	165.06	119.05	166.063	C9H10O3	[M-H]-	Phenolic acids	501-97-3
L-Fucitol	165.08	59.02	166.084	C6H14O5	[M-H]-	Others	13074-06-1
Sodium Valproate	143.11	143.11	166.097	C8H15NaO2	[M-Na]-	Organic acids	1069-66-5
1-(4-Methoxyphenyl)-1-propanol	165.09	149.06	166.099	C10H14O2	[M-H]-	Phenolic acids	5349-60-0
2-Amino-3-methoxybenzoic acid	168.06	94.06	167.058	C8H9NO3	[M+H]+	Phenolic acids	3177-80-8
Pyridoxal	168.06	150.05	167.058	C8H9NO3	[M+H]+	Others	66-72-8
Phosphoenolpyruvate	166.98	78.7	167.982	C3H5O6P	[M-H]-	Organic acids	138-08-9
Uric acid	167.02	124.01	168.028	C5H4N4O3	[M-H]-	Nucleotides and derivatives	69-93-2
Protocatechuic Acid Methyl Ester	167.04	108.02	168.042	C8H8O4	[M-H]-	Phenolic acids	2150-43-8
Gallacetophenone	169.05	65.03	168.042	C8H8O4	[M+H]+	Phenolic acids	528-21-2
3-Hydroxy-4-methoxybenzoic acid	169.05	65.04	168.042	C8H8O4	[M+H]+	Phenolic acids	645-08-9
Vanillic acid	167.03	108.02	168.042	C8H8O4	[M-H]-	Phenolic acids	121-34-6
Pyridoxine	170.08	134.1	169.074	C8H11NO3	[M+H]+	Others	65-23-6
DL-Glyceraldehyde-3-phosphate	169	79	169.998	C3H7O6P	[M-H]-	Organic acids	591-59-3
Dihydroxyacetone phosphate	168.99	78.96	169.998	C3H7O6P	[M-H]-	Others	57-04-5
2-Undecanone	171.17	55.05	170.167	C11H22O	[M+H]+	Others	112-12-9
L-Glycyl-L-proline	173.09	115.5	172.085	C7H12N2O3	[M+H]+	Amino acids and derivatives	704-15-4
9-Oxononanoic acid	171.1	99.08	172.11	C9H16O3	[M-H]-	Organic acids	2553-17-5
Decanoic acid	171.14	153.14	172.146	C10H20O2	[M-H]-	Organic acids	334-48-5
N-Acetyl-L-leucine	174.11	86	173.105	C8H15NO3	[M+H]+	Amino acids and derivatives	1188-21-2
Trans-Citridic acid	175.02	99	174.016	C6H6O6	[M+H]+	Organic acids	4023-65-8
Suberic Acid	173.08	111	174.089	C8H14O4	[M-H]-	Organic acids	505-48-6
2-Propylglutaric acid	173.08	59.01	174.089	C8H14O4	[M-H]-	Organic acids	32806-62-5
N-α-Acetyl-L-ornithine	173.11	131.08	174.1	C7H14N2O3	[M-H]-	Amino acids and derivatives	6205-08-9
L-Arginine	175.12	116	174.112	C6H14N4O2	[M+H]+	Amino acids and derivatives	74-79-3
N-Acetyl-L-Aspartic Acid	174.04	88	175.048	C6H9NO5	[M-H]-	Amino acids and derivatives	997-55-7
Indole 3-acetic acid (IAA)	176.1	130.1	175.063	C10H9NO2	[M+H]+	Alkaloids	87-51-4
L-Citrulline	176.1	113	175.096	C6H13N3O3	[M+H]+	Amino acids and derivatives	372-75-8
D-Glucurono-6,3-lactone	175.02	85.03	176.032	C6H8O6	[M-H]-	Others	32449-92-6
3-Isopropylmalic Acid	175.06	115.04	176.068	C7H12O5	[M-H]-	Organic acids	921-28-8
2-Isopropylmalic Acid	175.06	115	176.068	C7H12O5	[M-H]-	Organic acids	49601-06-1
2-Propylmalic Acid	175.06	115.04	176.068	C7H12O5	[M-H]-	Organic acids	-
6-Hydroxy-N-methylmyosmine	177.1	80.05	176.095	C10H12N2O	[M+H]+	Alkaloids	68104-57-4
Daphnetin	177.02	121	178.027	C9H6O4	[M-H]-	Lignans and Coumarins	486-35-1
Esculetin	177.02	133.2	178.027	C9H6O4	[M-H]-	Lignans and Coumarins	305-01-1
3,7-Dihydroxychromen-4-one	179.03	77.04	178.027	C9H6O4	[M+H]+	Others	-
L-Gulono-1,4-Lactone	177.04	59	178.048	C6H10O6	[M-H]-	Others	1128-23-0
Coniferaldehyde	179.07	91	178.063	C10H10O3	[M+H]+	Phenolic acids	20649-42-7
p-Coumaric acid methyl ester	179.07	147.1	178.063	C10H10O3	[M+H]+	Phenolic acids	3943-97-3
4-Methoxycinnamic acid	177	145	178.063	C10H10O3	[M-H]-	Phenolic acids	830-09-1
Isoxanthopterin	178.04	136.02	179.044	C6H5N5O2	[M-H]-	Nucleotides and derivatives	529-69-1
Caffeic acid	179.03	135.05	180.042	C9H8O4	[M-H]-	Phenolic acids	331-39-5
5-Acetylsalicylic acid	181.05	107.05	180.042	C9H8O4	[M+H]+	Phenolic acids	13110-96-8
D-Mannose*	179.06	59	180.063	C6H12O6	[M-H]-	Others	3458-28-4
D-Fructose*	179.06	59.01	180.063	C6H12O6	[M-H]-	Others	7660-25-5
D-Glucose*	179.06	59.01	180.063	C6H12O6	[M-H]-	Others	14431-43-7
Inositol*	179.05	59.01	180.063	C6H12O6	[M-H]-	Others	87-89-8
D-Galactose*	179.06	59	180.063	C6H12O6	[M-H]-	Others	59-23-4
1,7-Dimethylxanthine	181.07	124	180.065	C7H8N4O2	[M+H]+	Nucleotides and derivatives	611-59-6
Propyl 4-hydroxybenzoate	179.07	92.03	180.079	C10H12O3	[M-H]-	Phenolic acids	94-13-3
Coniferyl alcohol	179.07	146	180.079	C10H12O3	[M-H]-	Phenolic acids	458-35-5
4-Methoxyphenylpropionic acid	179.07	146.04	180.079	C10H12O3	[M-H]-	Phenolic acids	-
Olivetol	179.11	137.1	180.115	C11H16O2	[M-H]-	Phenolic acids	500-66-3
L-Tyrosine	182.08	136.1	181.074	C9H11NO3	[M+H]+	Amino acids and derivatives	60-18-4
N-(2-Hydroxy-4-methoxyphenyl)acetamide	182.08	91.05	181.074	C9H11NO3	[M+H]+	Alkaloids	58469-06-0
Vanillic acid methyl ester	181.05	107.01	182.058	C9H10O4	[M-H]-	Phenolic acids	3943-74-6
Methyl 2,4-dihydroxyphenylacetate	181.05	135.04	182.058	C9H10O4	[M-H]-	Phenolic acids	67828-42-6
(S)-2-Hydroxy-3-(4-Hydroxyphenyl)Propanoic Acid	181.05	135.04	182.058	C9H10O4	[M-H]-	Phenolic acids	23508-35-2
Syringaldehyde	183.07	140.05	182.058	C9H10O4	[M+H]+	Phenolic acids	134-96-3
Hydroxyphenyllactic acid	181.05	135.04	182.058	C9H10O4	[M-H]-	Phenolic acids	306-23-0
Dulcitol*	181.07	101	182.079	C6H14O6	[M-H]-	Others	608-66-2
D-Sorbitol*	181.07	71	182.079	C6H14O6	[M-H]-	Others	50-70-4
4-Pyridoxic acid	184.06	148	183.053	C8H9NO4	[M+H]+	Others	82-82-6
O-Phosphocholine	184	125	184.073	C5H15NO4P+	[M]+	Alkaloids	107-73-3
10-Undecenoic acid	183.14	183.14	184.146	C11H20O2	[M-H]-	Lipids	112-38-9
3-Phospho-D-glyceric acid	184.98	78.96	185.993	C3H7O7P	[M-H]-	Others	820-11-1
Undecylic Acid	185.15	185.16	186.162	C11H22O2	[M-H]-	Lipids	112-37-8
3-Indoleacrylic acid	188.07	118.07	187.063	C11H9NO2	[M+H]+	Alkaloids	1204-06-4
Azelaic acid	187.1	125	188.105	C9H16O4	[M-H]-	Organic acids	123-99-9
Diethyl glutarate	189.11	87	188.105	C9H16O4	[M+H]+	Organic acids	818-38-2
N-Glycyl-L-leucine*	189.12	86	188.116	C8H16N2O3	[M+H]+	Amino acids and derivatives	869-19-2
N6-Acetyl-L-lysine	189.12	126	188.116	C8H16N2O3	[M+H]+	Amino acids and derivatives	692-04-6
L-Glycyl-L-isoleucine*	189.12	86.1	188.116	C8H16N2O3	[M+H]+	Amino acids and derivatives	19461-38-2
N-Monomethyl-L-arginine	189.13	70.07	188.127	C7H16N4O2	[M+H]+	Amino acids and derivatives	17035-90-4
Homoarginine	189.13	144	188.127	C7H16N4O2	[M+H]+	Amino acids and derivatives	156-86-5
Arginine methyl ester	189.14	70.07	188.127	C7H16N4O2	[M+H]+	Amino acids and derivatives	-
2,6-Dimethyl-7-octene-2,3,6-triol	187.13	97	188.141	C10H20O3	[M-H]-	Others	73815-21-1
Trimethyllysine	189.16	84.08	188.152	C9H20N2O2	[M+H]+	Amino acids and derivatives	23284-33-5
N-Acetyl-L-glutamic acid	188.06	128	189.064	C7H11NO5	[M-H]-	Amino acids and derivatives	1188-37-0
3-Indolepropionic acid	190.09	118.07	189.07	C11H11NO2	[M+H]+	Alkaloids	830-96-6
L-Homocitrulline	190.12	127	189.111	C7H15N3O3	[M+H]+	Amino acids and derivatives	1190-49-4
2,6-Diaminooimelic acid	191.1	128	190.095	C7H14N2O4	[M+H]+	Organic acids	583-93-7
N-Acetyl-L-methionine	190.1	84	191.062	C7H13NO3S	[M-H]-	Amino acids and derivatives	65-82-7
Citric Acid*	191.02	111.01	192.027	C6H8O7	[M-H]-	Organic acids	77-92-9
Isocitric Acid*	191.02	111.01	192.027	C6H8O7	[M-H]-	Organic acids	320-77-4
6,7-Dihydroxy-4-methylcoumarin	193.05	105.07	192.042	C10H8O4	[M+H]+	Lignans and Coumarins	529-84-0
Isoscopoletin (6-Hydroxy-7-Methoxycoumarin)	193.05	178.02	192.042	C10H8O4	[M+H]+	Lignans and Coumarins	776-86-3
Quinic Acid	191.06	85	192.063	C7H12O6	[M-H]-	Organic acids	77-95-2
D-Galacturonic acid*	193.04	72.8	194.033	C6H10O7	[M-H]-	Others	685-73-4
D-Glucoronic acid*	193.04	73	194.043	C6H10O7	[M-H]-	Others	6556-12-3
Vanillin acetate	195.06	93.03	194.058	C10H10O4	[M+H]+	Phenolic acids	881-68-5
Isoferulic Acid*	193.06	134	194.058	C10H10O4	[M-H]-	Phenolic acids	537-73-5
Dimethyl phthalate	195.06	163.04	194.058	C10H10O4	[M+H]+	Phenolic acids	131-11-3
Ferulic acid*	193.05	134.01	194.058	C10H10O4	[M-H]-	Phenolic acids	537-98-4
Caffeine	195.09	83.06	194.08	C8H10N4O2	[M+H]+	Alkaloids	58-08-2
L-Tyrosine methyl ester	196.1	91.05	195.09	C10H13NO3	[M+H]+	Amino acids and derivatives	1080-06-4
Gluconic acid	195.05	74.9	196.058	C6H12O7	[M-H]-	Others	526-95-4
2,4,5-Trimethoxybenzaldehyde	197.08	138.07	196.074	C10H12O4	[M+H]+	Phenolic acids	4460-86-0
3,4-Dihydroxy-L-phenylalanine (L-Dopa)	198.08	152.2	197.069	C9H11NO4	[M+H]+	Amino acids and derivatives	59-92-7
Syringic acid	197.05	123	198.053	C9H10O5	[M-H]-	Phenolic acids	530-57-4
D-Erythrose-4-phosphate	199	78.96	200.009	C4H9O7P	[M-H]-	Others	585-18-2
Dodecanoic acid (Lauric acid)	199.17	199.17	200.178	C12H24O2	[M-H]-	Lipids	143-07-7
Acetryptine	203.12	144	202.111	C12H14N2O	[M+H]+	Alkaloids	3551-18-6
2-Pentyl-3-phenyl-2-propenal	203.14	129.07	202.136	C14H18O	[M+H]+	Others	122-40-7
N,N'-Dimethylarginine;SDMA	203.15	70.07	202.143	C8H18N4O2	[M+H]+	Amino acids and derivatives	30344-00-4
NG,NG-Dimethyl-L-arginine	203.15	70.07	202.143	C8H18N4O2	[M+H]+	Amino acids and derivatives	30315-93-6
Spermine	203.22	83	202.216	C10H26N4	[M+H]+	Alkaloids	71-44-3
L-Tryptophan	203.08	116.05	204.09	C11H12N2O2	[M-H]-	Amino acids and derivatives	73-22-3
4,8-Dihydroxyquinoline-2-carboxylic acid	204.03	160.04	205.038	C10H7NO4	[M-H]-	Organic acids	59-00-7
Methoxyindoleacetic acid	206.1	147.5	205.074	C11H11NO3	[M+H]+	Alkaloids	3471-31-6
D-Panthenol	206.14	76	205.131	C9H19NO4	[M+H]+	Others	81-13-0
(E)-Ethyl p-methoxycinnamate	207.1	161.06	206.094	C12H14O3	[M+H]+	Phenolic acids	24393-56-4
2,6-Di-tert-butylphenol*	205.16	189.13	206.167	C14H22O	[M-H]-	Phenolic acids	128-39-2
2,4-Di-Tert-Butylphenol*	205.16	189.13	206.167	C14H22O	[M-H]-	Phenolic acids	96-76-4
N-Acetyl-L-phenylalanine	206.08	58.03	207.09	C11H13NO3	[M-H]-	Amino acids and derivatives	2018-61-3
Isofraxetin*	209.05	194.02	208.037	C10H8O5	[M+H]+	Lignans and Coumarins	50656-75-2
3-[(1-Carboxyvinyl)oxy]benzoic acid	207.03	119.05	208.037	C10H8O5	[M-H]-	Phenolic acids	16929-37-6
Fraxetin (7,8-Dihydroxy-6-methoxycoumarin)*	209.04	149.1	208.037	C10H8O5	[M+H]+	Lignans and Coumarins	574-84-5
Sinapinaldehyde	207.07	192	208.074	C11H12O4	[M-H]-	Phenolic acids	4206-58-0
Ethyl caffeate	207.07	135.1	208.074	C11H12O4	[M-H]-	Phenolic acids	102-37-4
Ferulic acid methyl ester	207.07	133.03	208.074	C11H12O4	[M-H]-	Phenolic acids	2309-07-1
3,4-Dimethoxycinnamic acid	209.08	191.07	208.074	C11H12O4	[M+H]+	Phenolic acids	2316-26-9
Dambonitol	207.09	59.01	208.095	C8H16O6	[M-H]-	Others	523-94-4
D-Galactaric acid*	209.03	85.03	210.038	C6H10O8	[M-H]-	Others	526-99-8
D-Saccharic acid*	209.03	85.03	210.038	C6H10O8	[M-H]-	Others	87-73-0
Sedoheptulose*	209.07	59.01	210.073	C7H14O7	[M-H]-	Others	3019-74-7
Methyl 3-(3-hydroxy-4-methoxyphenyl)propanoate	209.08	179.03	210.089	C11H14O4	[M-H]-	Phenolic acids	129150-61-4
Sinapyl alcohol	209.08	179	210.089	C11H14O4	[M-H]-	Phenolic acids	537-33-7
Jasmonic acid	209.12	59.02	210.126	C12H18O3	[M-H]-	Organic acids	77026-92-7
Creatine Phosphate	210.03	78.9	211.036	C4H10N3O5P	[M-H]-	Organic acids	67-07-2
Dihydrojasmonic acid	211.1	167	212.141	C12H20O3	[M-H]-	Organic acids	3572-64-3
δ-Tridecalactone	213.3	81	212.178	C13H24O2	[M+H]+	Lipids	7370-92-5
2-Deoxyribose-1-phosphate	213.1	97	214.024	C5H11O7P	[M-H]-	Nucleotides and derivatives	17210-42-3
Tridecanoic Acid	213.19	195	214.193	C13H26O2	[M-H]-	Lipids	638-53-9
3-Chloro-L-tyrosine	214.03	117	215.035	C9H10ClNO3	[M-H]-	Amino acids and derivatives	7423-93-0
Sodium ferulate	193.05	161.02	216.04	C10H9NaO4	[M-Na]-	Phenolic acids	24276-84-4
8-Methoxypsoralen	217.05	202	216.042	C12H8O4	[M+H]+	Lignans and Coumarins	298-81-7
N-Acetyl-L-Arginine	217.13	158	216.122	C8H16N4O3	[M+H]+	Amino acids and derivatives	155-84-0
Undecanedioic acid	215.13	153.13	216.136	C11H20O4	[M-H]-	Lipids	1852-04-6
12-Hydroxydodecanoic acid	215.17	169.16	216.173	C12H24O3	[M-H]-	Lipids	505-95-3
5-L-Glutamyl-L-amino acid	217.08	199	218.09	C8H14N2O5	[M-H]-	Amino acids and derivatives	5875-41-2
N-Acetyl-5-hydroxytryptamine	219.11	160	218.106	C12H14N2O2	[M+H]+	Alkaloids	1210-83-9
N,N-Dimethyl-5-methoxytryptamine	219.1	174.4	218.142	C13H18N2O	[M+H]+	Alkaloids	1019-45-0
D-Pantothenic Acid	220.12	202.1	219.111	C9H17NO5	[M+H]+	Others	79-83-4
5-Hydroxy-L-tryptophan	221.09	204	220.085	C11H12N2O3	[M+H]+	Amino acids and derivatives	56-69-9
N-Acetyl-D-glucosamine	222	144	221.09	C8H15NO6	[M+H]+	Others	7512-17-6
N-Acetyl-D-galactosamine	222.1	84.05	221.09	C8H15NO6	[M+H]+	Others	1811-31-0
Isofraxidin	223.06	190.03	222.053	C11H10O5	[M+H]+	Lignans and Coumarins	486-21-5
Umckalin (7-hydroxy-5,6-dimethoxycoumarin)	223.06	190.03	222.053	C11H10O5	[M+H]+	Lignans and Coumarins	43053-62-9
Fraxidin (8-Hydroxy-6,7-dimethoxycoumarin)	223.06	208.04	222.053	C11H10O5	[M+H]+	Lignans and Coumarins	525-21-3
L-Glycyl-L-phenylalanine	223.11	120.09	222.1	C11H14N2O3	[M+H]+	Amino acids and derivatives	721-66-4
N-Acetyl-L-tyrosine	224.09	136	223.084	C11H13NO4	[M+H]+	Amino acids and derivatives	537-55-3
Sideretin (5,7,8-Trihydroxy-6-methoxycoumarin)	223.03	149.03	224.032	C10H8O6	[M-H]-	Lignans and Coumarins	-
Sinapic acid	223.06	193	224.068	C11H12O5	[M-H]-	Phenolic acids	530-59-6
3,4'-Dihydroxy-3',5'-dimethoxypropiophenone	227.09	181.05	226.084	C11H14O5	[M+H]+	Phenolic acids	136196-47-9
Myristoleic acid	225.19	207	226.193	C14H26O2	[M-H]-	Lipids	544-64-9
2'-Deoxycytidine	228.1	112	227.091	C9H13N3O4	[M+H]+	Nucleotides and derivatives	951-77-9
Resveratrol	227.07	185	228.079	C14H12O3	[M-H]-	Others	501-36-0
2-Dodecenedioic acid	227.13	183.14	228.136	C12H20O4	[M-H]-	Lipids	6402-36-4
Myristic Acid	227.2	227.2	228.209	C14H28O2	[M-H]-	Lipids	544-63-8
L-Prolyl-L-Leucine	229.15	70.07	229.154	C11H20N2O3	[M+H]+	Amino acids and derivatives	52899-07-7
Ribulose-5-phosphate	229.01	96.97	230.02	C5H11O8P	[M-H]-	Others	4300-28-1
Dodecanedioic aicd	229.14	211	230.152	C12H22O4	[M-H]-	Lipids	693-23-2
L-Valyl-L-Leucine	231.16	72.08	231.17	C11H22N2O3	[M+H]+	Amino acids and derivatives	3989-97-7
p-Coumaroylputrescine	235.14	147.04	234.137	C13H18N2O2	[M+H]+	Alkaloids	34136-53-3
L-Lysine-Butanoic Acid	235.1	118.3	234.158	C10H22N2O4	[M+H]+	Amino acids and derivatives	80407-71-2
L-Alanyl-L-Phenylalanine	237.12	120.09	236.116	C12H16N2O3	[M+H]+	Amino acids and derivatives	3061-90-3
Benzoylmalic acid	237.04	121.03	238.048	C11H10O6	[M-H]-	Phenolic acids	22138-51-8
3,4,5-Trimethoxycinnamic acid	237.08	103	238.084	C12H14O5	[M-H]-	Phenolic acids	90-50-6
Cis-10-Pentadecenoic Acid(C15: 1)	239.2	223.03	240.209	C15H28O2	[M-H]-	Lipids	84743-29-3
Palmitaldehyde	239	223	240.245	C16H32O	[M-H]-	Lipids	629-80-1
5-Methyl-2'-Deoxycytidine	242.11	126.07	241.106	C10H15N3O4	[M+H]+	Nucleotides and derivatives	838-07-3
Lumichrome	243.09	145	242.08	C12H10N4O2	[M+H]+	Alkaloids	1086-80-2
Thymidine	243.1	127	242.09	C10H14N2O5	[M+H]+	Nucleotides and derivatives	50-89-5
3,4′-Dihydroxy-5-methoxystilbene	241.09	225.05	242.094	C15H14O3	[M-H]-	Others	42438-89-1
Pentadecanoic Acid	241.22	241.22	242.225	C15H30O2	[M-H]-	Lipids	1002-84-2
13-methylmyristic acid	241.22	241.21	242.225	C15H30O2	[M-H]-	Lipids	2485-71-4
Cytidine	244.09	112	243.086	C9H13N3O5	[M+H]+	Nucleotides and derivatives	65-46-3
Cytarabine	244.09	112.05	243.086	C9H13N3O5	[M+H]+	Nucleotides and derivatives	147-94-4
β-Pseudouridine	243.06	153	244.07	C9H12N2O6	[M-H]-	Nucleotides and derivatives	1445-07-4
Uridine	243.06	110	244.07	C9H12N2O6	[M-H]-	Nucleotides and derivatives	58-96-8
Piceatannol	243.07	159.1	244.074	C14H12O4	[M-H]-	Others	10083-24-6
Biotin	245.1	227	244.088	C10H16N2O3S	[M+H]+	Others	58-85-5
Tridecanedioic acid	243.16	181.16	244.167	C13H24O4	[M-H]-	Lipids	505-52-2
L-Leucyl-L-Leucine	245.18	86.1	245.186	C12H24N2O3	[M+H]+	Amino acids and derivatives	3303-31-9
N-Acetyl-L-Tryptophan	245.09	203.2	246.1	C13H14N2O3	[M-H]-	Amino acids and derivatives	1218-34-4
N-(3-Indolylacetyl)-L-alanine	247.11	130	246.1	C13H14N2O3	[M+H]+	Amino acids and derivatives	57105-39-2
L-Isoleucyl-L-Aspartate	247.13	86.09	246.121	C10H18N2O5	[M+H]+	Amino acids and derivatives	-
γ-Glutamyl-L-valine	247.13	184.1	246.122	C10H18N2O5	[M+H]+	Amino acids and derivatives	-
N-Caffeoylputrescine	251.14	163.04	250.132	C13H18N2O3	[M+H]+	Alkaloids	29554-26-5
4-Coumaroylcholine	250.14	147	250.144	C14H20NO3+	[M]+	Alkaloids	-
Cordycepin (3'-Deoxyadenosine)	252.11	69	251.102	C10H13N5O3	[M+H]+	Nucleotides and derivatives	73-03-0
2'-Deoxyadenosine	252.11	136	251.102	C10H13N5O3	[M+H]+	Nucleotides and derivatives	958-09-8
2'-Deoxyinosine	253.09	137	252.086	C10H12N4O4	[M+H]+	Nucleotides and derivatives	890-38-0
Benzoyltartaric acid	253.04	121.03	254.043	C11H10O7	[M-H]-	Phenolic acids	-
p-Hydroxybenzoylmalic acid	253.04	137.02	254.043	C11H10O7	[M-H]-	Phenolic acids	-
6,7-Dihydroxyflavone	255.07	137.02	254.058	C15H10O4	[M+H]+	Flavonoids	38183-04-9
Chrysin	255.07	153	254.058	C15H10O4	[M+H]+	Flavonoids	480-40-0
Daidzein	255.07	137	254.058	C15H10O4	[M+H]+	Flavonoids	486-66-8
1-O-Caffeoylglycerol	255.09	163.03	254.079	C12H14O6	[M+H]+	Lipids	-
Palmitoleic Acid*	253.22	235.19	254.225	C16H30O2	[M-H]-	Lipids	373-49-9
(7Z)-Hexadecenoic acid*	253.22	235.21	254.225	C16H30O2	[M-H]-	Lipids	2416-19-5
Liquiritigenin	255.07	135	256.074	C15H12O4	[M-H]-	Flavonoids	578-86-9
2,4,4'-trihydroxychalcone	257.08	137.02	256.074	C15H12O4	[M+H]+	Flavonoids	-
3,9-Dihydroxypterocarpan	255.07	119.05	256.074	C15H12O4	[M-H]-	Flavonoids	61135-91-9
Nicotinate D-ribonucleoside	256.2	124.1	256.082	C11H14NO6+	[M+H]+	Others	17720-18-2
Phenyl-beta-D-glucopyranoside	255.09	93.03	256.095	C12H16O6	[M-H]-	Phenolic acids	1464-44-4
Pterostilbene	255.1	239	256.11	C16H16O3	[M-H]-	Others	537-42-8
Palmitic acid	255.23	237.22	256.24	C16H32O2	[M-H]-	Lipids	57-10-3
5-Methyluridine	257.08	124	258.085	C10H14N2O6	[M-H]-	Nucleotides and derivatives	1463-10-1
1,14-Tetradecanedioic Acid	257.18	195.18	258.183	C14H26O4	[M-H]-	Lipids	821-38-5
D-Glucosamine 1-phosphate	258.04	78.96	259.046	C6H14NO8P	[M-H]-	Others	2152-75-2
Glucose-1-phosphate*	259.02	97	260.03	C6H13O9P	[M-H]-	Others	59-56-3
D-Fructose 6-phosphate*	259	97	260.03	C6H13O9P	[M-H]-	Others	643-13-0
D-Glucose 6-phosphate*	259.02	97	260.03	C6H13O9P	[M-H]-	Others	56-73-5
L-γ-Glutamyl-L-leucine	261.14	86.1	260.137	C11H20N2O5	[M+H]+	Amino acids and derivatives	2566-39-4
9α-Hydroxysophoramine	261.16	243.15	260.152	C15H20N2O2	[M+H]+	Alkaloids	-
Glycyl-tryptophan	262.12	188.07	261.111	C13H15N3O3	[M+H]+	Amino acids and derivatives	2390-74-1
Sorbitol-6-phosphate	261.04	78.96	262.045	C6H15O9P	[M-H]-	Others	20479-58-7
L-Prolyl-L-Phenylalanine	263.13	70.07	263.139	C14H18N2O3	[M+H]+	Amino acids and derivatives	13589-02-1
Phenylacetyl-L-glutamine	263.1	145	264.111	C13H16N2O4	[M-H]-	Amino acids and derivatives	28047-15-6
Abscisic acid	263.13	204.12	264.136	C15H20O4	[M-H]-	Organic acids	21293-29-8
N-Feruloylputrescine	265.15	177.06	264.147	C14H20N2O3	[M+H]+	Alkaloids	501-13-3
Norlinolenic acid	263.2	59.01	264.209	C17H28O2	[M-H]-	Lipids	-
Caffeoylcholine	266.13	207.06	266.124	C14H20NO4+	[M]+	Alkaloids	87189-10-4
Dihydroferuloylputrescine	267.17	179.07	266.163	C14H22N2O3	[M+H]+	Alkaloids	-
Vidarabine	268.11	136.06	267.097	C10H13N5O4	[M+H]+	Others	5536-17-4
2'-Deoxyguanosine	268.1	152	267.097	C10H13N5O4	[M+H]+	Nucleotides and derivatives	961-07-9
Adenosine	268.1	136.06	267.097	C10H13N5O4	[M+H]+	Nucleotides and derivatives	58-61-7
Formononetin (7-Hydroxy-4'-methoxyisoflavone)	269.08	213.09	268.074	C16H12O4	[M+H]+	Flavonoids	485-72-3
Tectochrysin	269.08	226	268.074	C16H12O4	[M+H]+	Flavonoids	520-28-5
Inosine	269.09	137	268.081	C10H12N4O5	[M+H]+	Nucleotides and derivatives	58-63-9
9-(Arabinosyl)hypoxanthine	267.07	135	268.081	C10H12N4O5	[M-H]-	Nucleotides and derivatives	7013-16-3
1-Feruloyl-sn-glycerol	269.1	177.05	268.095	C13H16O6	[M+H]+	Phenolic acids	-
2-Feruloyl-sn-glycerol	269.1	177.05	268.095	C13H16O6	[M+H]+	Phenolic acids	-
10-Heptadecenoic Acid	267.23	267.23	268.24	C17H32O2	[M-H]-	Lipids	29743-97-3
p-Hydroxybenzoyltartaric acid	269.03	137.02	270.038	C11H10O8	[M-H]-	Phenolic acids	-
6-Hydroxydaidzein	271.06	215	270.053	C15H10O5	[M+H]+	Flavonoids	17817-31-1
Medicarpin	269.08	209	270.089	C16H14O4	[M-H]-	Phenolic acids	32383-76-9
Isoimperatorin	271.1	147.2	270.089	C16H14O4	[M+H]+	Lignans and Coumarins	482-45-1
Phenyl-β-D-glucopyranoside	271.12	91.05	270.11	C13H18O6	[M+H]+	Others	-
Heptadecanoic acid	269.25	269.24	270.256	C17H34O2	[M-H]-	Lipids	506-12-7
Methyl palmitate	269.25	251.24	270.256	C17H34O2	[M-H]-	Lipids	112-39-0
1-Octadecanol	269.29	209.2	270.292	C18H38O	[M-H]-	Lipids	112-92-5
Butin*	273.08	153	272.068	C15H12O5	[M+H]+	Flavonoids	492-14-8
Naringenin chalcone	273.08	153	272.068	C15H12O5	[M+H]+	Flavonoids	73692-50-9
Pinobanksin*	271.06	151	272.068	C15H12O5	[M-H]-	Flavonoids	548-82-3
Naringenin (5,7,4'-Trihydroxyflavanone)*	271.06	151	272.068	C15H12O5	[M-H]-	Flavonoids	480-41-1
Arbutin	271.08	108.02	272.09	C12H16O7	[M-H]-	Phenolic acids	497-76-7
2-Hydroxyhexadecanoic acid	271.23	225.22	272.235	C16H32O3	[M-H]-	Organic acids	764-67-0
N-Lauryldiethanolamine	275.1	213.2	273.267	C16H35NO2	[M+H]+	Lipids	1541-67-9
Epiafzelechin	275.09	107	274.084	C15H14O5	[M+H]+	Flavonoids	24808-04-6
Triethyl citrate	277.13	115.04	276.121	C12H20O7	[M+H]+	Organic acids	77-93-0
L-Saccharopine	275	257	276.132	C11H20N2O6	[M-H]-	Amino acids and derivatives	997-68-2
9,12-Octadecadien-6-Ynoic Acid	277.2	93	276.209	C18H28O2	[M+H]+	Lipids	61481-29-6
γ-glutamylmethionine	279.1	133.03	278.094	C10H18N2O5S	[M+H]+	Amino acids and derivatives	17663-87-5
Pantetheine	277.12	146	278.13	C11H22N2O4S	[M-H]-	Others	496-65-1
Diisobutyl phthalate*	279.16	149.02	278.152	C16H22O4	[M+H]+	Phenolic acids	84-69-5
Dibutyl phthalate*	279.16	149.02	278.152	C16H22O4	[M+H]+	Phenolic acids	84-74-2
Punicic acid (9Z,11E,13Z-octadecatrienoic acid)	279.23	95.1	278.225	C18H30O2	[M+H]+	Lipids	544-72-9
γ-Linolenic Acid*	277.22	277.22	278.225	C18H30O2	[M-H]-	Lipids	506-26-3
Crepenynic acid	277.22	59.01	278.225	C18H30O2	[M-H]-	Lipids	2277-31-8
Octadeca-11E,13E,15Z-trienoic acid	279.2	149.4	278.225	C18H30O2	[M+H]+	Lipids	25575-00-2
α-Linolenic Acid*	277.22	277.22	278.225	C18H30O2	[M-H]-	Lipids	463-40-1
p-Coumaroylmalic acid	279.05	163.04	280.058	C13H12O7	[M-H]-	Phenolic acids	-
Cinnamoyltartaric acid	279.05	147.04	280.058	C13H12O7	[M-H]-	Phenolic acids	-
L-Aspartyl-L-Phenylalanine	281.11	166	280.106	C13H16N2O5	[M+H]+	Amino acids and derivatives	13433-09-5
6-Methoxy-2-(2-phenylethyl)chromone	281.12	91.05	280.11	C18H16O3	[M+H]+	Others	84294-89-3
Feruloylcholine	280.15	221.08	280.138	C15H22NO4+	[M]+	Alkaloids	85927-25-9
Linoleic acid	279.23	279.23	280.24	C18H32O2	[M-H]-	Lipids	60-33-3
(9Z,11E)-Octadecadienoic acid	279.23	59.01	280.24	C18H32O2	[M-H]-	Lipids	2540-56-9
N6-methyladenosine	282.12	150.08	281.112	C11H15N5O4	[M+H]+	Nucleotides and derivatives	1867-73-8
2'-O-Methyladenosine	282.12	136.06	281.112	C11H15N5O4	[M+H]+	Nucleotides and derivatives	2140-79-6
Oleamide (9-Octadecenamide)	282.28	247.24	281.272	C18H35NO	[M+H]+	Lipids	301-02-0
7,4'-Di-O-methyldaidzein	283.1	268.07	282.089	C17H14O4	[M+H]+	Flavonoids	1157-39-7
Petroselinic acid	281.25	281.25	282.256	C18H34O2	[M-H]-	Lipids	593-39-5
11-Octadecanoic acid(Vaccenic acid)	281.25	281.25	282.256	C18H34O2	[M-H]-	Lipids	506-17-2
Guanosine	284.1	152	283.092	C10H13N5O5	[M+H]+	Nucleotides and derivatives	118-00-3
Crotonoside; 2-Hydroxyadenosine	284.1	152.06	283.092	C10H13N5O5	[M+H]+	Nucleotides and derivatives	1818-71-9
Stearamide	284.3	102.09	283.288	C18H37NO	[M+H]+	Alkaloids	124-26-5
Calycosin	285.08	270	284.068	C16H12O5	[M+H]+	Flavonoids	20575-57-9
Acacetin	285.08	270	284.068	C16H12O5	[M+H]+	Flavonoids	480-44-4
3'-Methoxydaidzein	285.08	229.08	284.068	C16H12O5	[M+H]+	Flavonoids	21913-98-4
3',7-dihydroxy-4'-methoxyflavone	285.08	270.05	284.068	C16H12O5	[M+H]+	Flavonoids	-
Biochanin A	285.08	270	284.068	C16H12O5	[M+H]+	Flavonoids	491-80-5
Prunetin (5,4'-Dihydroxy-7-methoxyisoflavone)	283.06	268	284.068	C16H12O5	[M-H]-	Flavonoids	552-59-0
Glycitein	283.06	268	284.068	C16H12O5	[M-H]-	Flavonoids	40957-83-3
Genkwanin (Apigenin 7-methyl ether)	285.08	270	284.068	C16H12O5	[M+H]+	Flavonoids	437-64-9
Xanthosine	283.07	151	284.076	C10H12N4O6	[M-H]-	Nucleotides and derivatives	146-80-5
Phenethyl caffeate	283.1	135	284.105	C17H16O4	[M-H]-	Phenolic acids	104594-70-9
N-(beta-D-Glucosyl)nicotinate	286.09	124	285.085	C12H15NO7	[M+H]+	Others	-
Isoscutellarein	287.06	153.01	286.047	C15H10O6	[M+H]+	Flavonoids	41440-05-5
2'-Hydroxygenistein	287.06	153.02	286.047	C15H10O6	[M+H]+	Flavonoids	1156-78-1
6-Demethoxycapillarisin	287.06	195.03	286.048	C15H10O6	[M+H]+	Others	61854-36-2
3-Hydroxy-5-Methylphenol-1-O-Glucoside	285.1	123	286.105	C13H18O7	[M-H]-	Phenolic acids	-
Orcinol glucoside	285.1	123.05	286.105	C13H18O7	[M-H]-	Phenolic acids	21082-33-7
Hexadecanedioic acid	285.21	223.21	286.214	C16H30O4	[M-H]-	Lipids	505-54-4
3-Hydroxy-palmitic acid methyl ester	285.24	239.24	286.251	C17H34O3	[M-H]-	Lipids	51883-36-4
Aromadendrin (Dihydrokaempferol)	287.06	259	288.063	C15H12O6	[M-H]-	Flavonoids	480-20-6
2,6,7,4'-Tetrahydroxyisoflavanone	289.07	243.07	288.063	C15H12O6	[M+H]+	Flavonoids	-
Eriodictyol (5,7,3',4'-Tetrahydroxyflavanone)	287.06	135	288.063	C15H12O6	[M-H]-	Flavonoids	552-58-9
Glucarate O-Phosphoric acid	289	97	290.004	C6H11PO11	[M-H]-	Others	-
D-Sedoheptuiose 7-phosphate	289	97	290.04	C7H15O10P	[M-H]-	Others	2646-35-7
Argininosuccinic acid	289.1	97.1	290.123	C10H18N4O6	[M-H]-	Organic acids	2387-71-5
4-Oxo-9Z,11Z,13E,15E-Octadecatetraenoic Acid	291	190.9	290.188	C18H26O3	[M+H]+	Lipids	-
p-Coumaroylspermidine	292.2	147.04	291.195	C16H25N3O2	[M+H]+	Alkaloids	-
12-Oxo-phytodienoic acid	291.2	235.17	292.204	C18H28O3	[M-H]-	Lipids	85551-10-6
Methyl linolenate	293.25	95.09	292.24	C19H32O2	[M+H]+	Lipids	301-00-8
γ-Glutamylphenylalanine	293.11	164.07	294.122	C14H18N2O5	[M-H]-	Amino acids and derivatives	7432-24-8
Sinapoylputrescine	295.17	207.07	294.158	C15H22N2O4	[M+H]+	Alkaloids	70185-57-8
Longistylin A	295.17	239.11	294.161	C20H22O2	[M+H]+	Others	64095-60-9
9-Oxo-10E,12Z-octadecadienoic acid	293.21	275.1	294.219	C18H30O3	[M-H]-	Lipids	54232-59-6
13S-Hydroxy-9Z,11E,15Z-octadecatrienoic acid	293.21	195.14	294.219	C18H30O3	[M-H]-	Lipids	87984-82-5
13-KODE; (9Z,11E)-13-Oxooctadeca-9,11-dienoic acid	293.21	235.17	294.219	C18H30O3	[M-H]-	Lipids	54739-30-9
13-Hydroxy-6,9,11-octadecatrienoic acid	293.21	193.1	294.219	C18H30O3	[M-H]-	Lipids	74784-20-6
2R-hydroxy-9Z,12Z,15Z-octadecatrienoic acid	293.21	185.12	294.219	C18H30O3	[M-H]-	Lipids	-
17-Hydroxylinolenic acid	293.21	113.1	294.219	C18H30O3	[M-H]-	Lipids	-
E,E,Z-1,3,12-Nonadecatriene-5,14-diol	293.25	293.25	294.256	C19H34O2	[M-H]-	Lipids	-
5-Aminoimidazole ribonucleotide	296.07	104.11	295.056	C8H14N3O7P	[M+H]+	Nucleotides and derivatives	25635-88-5
Cis-Coutaric acid	295.05	163.04	296.053	C13H12O8	[M-H]-	Phenolic acids	67920-37-0
15(R)-Hydroxylinoleic Acid*	297.24	81.07	296.234	C18H32O3	[M+H]+	Lipids	177931-23-6
9-Oxo-12Z-Octadecenoic acid*	297.24	81.07	296.234	C18H32O3	[M+H]+	Lipids	112543-32-5
9(10)-EpOME;(9R,10S)-(12Z)-9,10-Epoxyoctadecenoic acid*	295.23	171.1	296.235	C18H32O3	[M-H]-	Lipids	16833-56-0
9S-Hydroxy-10E,12Z-octadecadienoic acid*	295.23	195.14	296.235	C18H32O3	[M-H]-	Lipids	15514-85-9
13(S)-HODE;13(S)-Hydroxyoctadeca-9Z,11E-dienoic acid*	295.23	195.14	296.235	C18H32O3	[M-H]-	Lipids	10219-69-9
12,13-Epoxy-9-Octadecenoic Acid*	295.23	195.2	296.235	C18H32O3	[M-H]-	Lipids	6799-85-5
5'-Deoxy-5'-(methylthio)adenosine	298.1	136	297.09	C11H15N5O3S	[M+H]+	Nucleotides and derivatives	2457-80-9
N7-Methylguanosine	298.1	166.3	297.107	C11H15N5O5	[M+H]+	Nucleotides and derivatives	20244-86-4
Puerol A	299.08	284.07	298.084	C17H14O5	[M+H]+	Phenolic acids	152784-32-2
Apigenin-7,4'-dimethyl ether	299.09	284.1	298.084	C17H14O5	[M+H]+	Flavonoids	5128-44-9
Afrormosin (6,4'-Dimethoxy-7-Hydroxyisoflavone)	299.09	284.07	298.084	C17H14O5	[M+H]+	Flavonoids	550-79-8
Aurapten	299.16	163.04	298.157	C19H22O3	[M+H]+	Lignans and Coumarins	495-02-3
Ricinoleic acid	297.24	183.14	298.251	C18H34O3	[M-H]-	Lipids	141-22-0
1-Eicosanol	297.32	183.1	298.324	C20H42O	[M-H]-	Lipids	629-96-9
3-Dehydrosphinganine	300.3	60.05	299.282	C18H37NO2	[M+H]+	Lipids	16105-69-4
D-Sphingosine	300.29	60.04	299.282	C18H37NO2	[M+H]+	Lipids	123-78-4
Vnilloyltartaric acid	299.04	167.03	300.048	C12H12O9	[M-H]-	Phenolic acids	-
Hispidulin (5,7,4'-Trihydroxy-6-methoxyflavone)*	301.07	286.05	300.063	C16H12O6	[M+H]+	Flavonoids	1447-88-7
6,7,8-Tetrahydroxy-5-methoxyflavone*	301.07	286.05	300.063	C16H12O6	[M+H]+	Flavonoids	-
Chrysoeriol	301.07	286.08	300.063	C16H12O6	[M+H]+	Flavonoids	491-71-4
Aracarpene 2	299.06	284.02	300.063	C16H12O6	[M-H]-	Flavonoids	-
Diosmetin (5,7,3'-Trihydroxy-4'-methoxyflavone)*	299.06	284	300.063	C16H12O6	[M-H]-	Flavonoids	520-34-3
4-O-Glucosyl-4-hydroxybenzoic acid	299.08	137.02	300.084	C13H16O8	[M-H]-	Phenolic acids	-
1-O-Salicyl-D-glucose	299.08	137.02	300.084	C13H16O8	[M-H]-	Phenolic acids	60517-74-0
Salicylic acid-2-O-glucoside	299.1	137.1	300.085	C13H16O8	[M-H]-	Phenolic acids	10366-91-3
Glucosyloxybenzoic acid	299.08	137.02	300.085	C13H16O8	[M-H]-	Phenolic acids	-
DL-2-hydroxystearic acid	299.26	253.25	300.266	C18H36O3	[M-H]-	Lipids	629-22-1
12-Hydroxyoctadecanoic acid	299.26	253.25	300.266	C18H36O3	[M-H]-	Lipids	106-14-9
2R-Hydroxyoctadecanoic Acid	299.26	253.26	300.266	C18H36O3	[M-H]-	Lipids	26633-48-7
3-Hydroxyoctadecanoic Acid	299.26	299.26	300.267	C18H36O3	[M-H]-	Lipids	45261-96-9
N-Acetyl-D-glucosamine-1-phosphate	300.05	96.9	301.056	C8H16NO9P	[M-H]-	Others	6866-69-9
Ellagic acid	301	185.02	302.006	C14H6O8	[M-H]-	Tannins	476-66-4
3'-Deoxy-4-O-methylsappanol	303.09	123.04	302.079	C16H14O6	[M+H]+	Others	-
Hesperetin	301.07	164	302.079	C16H14O6	[M-H]-	Flavonoids	520-33-2
Tachioside	301.09	123.01	302.1	C13H18O8	[M-H]-	Phenolic acids	109194-60-7
4-O-Glucosyl-3,4-dihydroxybenzyl alcohol	301.09	139.05	302.1	C13H18O8	[M-H]-	Phenolic acids	-
Salirepin	301.09	139.04	302.1	C13H18O8	[M-H]-	Phenolic acids	26652-12-0
Enterodiol	301.14	253	302.152	C18H22O4	[M-H]-	Others	80226-00-2
1-Monomyristin	303.25	57.07	302.246	C17H34O4	[M+H]+	Lipids	589-68-4
Nicotianamine	304.15	185.09	303.143	C12H21N3O6	[M+H]+	Alkaloids	34441-14-0
Arachidonic Acid	303.23	258.9	304.24	C20H32O2	[M-H]-	Lipids	506-32-1
N-Feruloylagmatine	307.18	177.05	306.169	C15H22N4O3	[M+H]+	Alkaloids	-
2'-Deoxycytidine-5'-monophosphate	306.05	110	307.057	C9H14N3O7P	[M-H]-	Nucleotides and derivatives	1032-65-1
L-Glutamine-O-glycoside	307	145	308.122	C11H20N2O8	[M-H]-	Amino acids and derivatives	-
Eicosadienoic acid	307.26	307.3	308.272	C20H36O2	[M-H]-	Lipids	5598-38-9
Feruloylmalic acid	309.06	193.05	310.069	C14H14O8	[M-H]-	Phenolic acids	-
9-Hydroperoxy-10E,12,15Z-octadecatrienoic acid	309.21	209.1	310.1	C18H30O4	[M-H]-	Lipids	111004-08-1
1-O-Cinnamoyl-β-D-glucose	309.1	147.05	310.105	C15H18O7	[M-H]-	Phenolic acids	40004-96-4
γ-Glutamyltyrosine	311.12	165.05	310.116	C14H18N2O6	[M+H]+	Amino acids and derivatives	7432-23-7
13(s)-hydroperoxy-(9z,11e,15z)-octadecatrienoic acid	309.2	227.2	310.214	C18H30O4	[M-H]-	Lipids	67597-26-6
9-Hydroxy-12-oxo-10(E),15(Z)-octadecadienoic acid	309.21	171.1	310.214	C18H30O4	[M-H]-	Lipids	-
13-Hydroxy-9Z,11E-octadecadienoic acid	311.26	279.32	310.25	C19H34O3	[M+H]+	Lipids	18104-45-5
Eicosenoic acid	309.28	309.28	310.287	C20H38O2	[M-H]-	Lipids	26764-41-0
2-(Dimethylamino)guanosine	312.13	180	311.123	C12H17N5O5	[M+H]+	Nucleotides and derivatives	2140-67-2
N6-(2-Hydroxyethyl)adenosine	312.13	180.09	311.123	C12H17N5O5	[M+H]+	Nucleotides and derivatives	4338-48-1
2-Caffeoyl-L-tartaric acid (Caftaric acid)	311.04	135.05	312.048	C13H12O9	[M-H]-	Phenolic acids	67879-58-7
1-O-Caffeoyl xylose	311.08	163.04	312.085	C14H16O8	[M-H]-	Phenolic acids	-
2-Acetyl-3-hydroxyphenyl-1-O-glucoside	311.11	149.06	312.121	C15H20O7	[M-H]-	Phenolic acids	-
L-Phenylalanyl-L-phenylalanine	313.15	166	312.147	C18H20N2O3	[M+H]+	Amino acids and derivatives	2577-40-4
9-Hydroxy-12-oxo-15(Z)-octadecenoic acid	311.22	223.17	312.23	C18H32O4	[M-H]-	Lipids	-
13S-Hydroperoxy-9Z,11E-octadecadienoic acid	311.1	171.3	312.23	C18H32O4	[M-H]-	Lipids	33964-75-9
5S,8R-DiHODE; (5S,8R,9Z,12Z)-5,8-Dihydroxyoctadeca-9,12-dienoate	311.22	223.17	312.23	C18H32O4	[M-H]-	Lipids	-
7S,8S-DiHODE; (9Z,12Z)-(7S,8S)-Dihydroxyoctadeca-9,12-dienoic acid	311.22	249.22	312.23	C18H32O4	[M-H]-	Lipids	143288-65-7
Arachidic acid	311.3	183.1	312.303	C20H40O2	[M-H]-	Lipids	506-30-9
4',5-Dihydroxy-3',5'-dimethoxyflavone	315.09	272.07	314.079	C17H14O6	[M+H]+	Flavonoids	-
Hydroxy ricinoleic acid	313.24	183.14	314.246	C18H34O4	[M-H]-	Lipids	-
12,13-DHOME; (9Z)-12,13-Dihydroxyoctadec-9-enoic acid	313.24	251.24	314.246	C18H34O4	[M-H]-	Lipids	263399-35-5
Dibutyl sebacate	315.25	185.12	314.246	C18H34O4	[M+H]+	Lipids	109-43-3
Isorhamnetin	315.05	151	316.058	C16H12O7	[M-H]-	Flavonoids	480-19-3
1-O-Gentisoyl-D-glucoside	315.07	153	316.079	C13H16O9	[M-H]-	Phenolic acids	23445-11-6
Protocatechuic acid-4-O-glucoside	315.07	153.02	316.079	C13H16O9	[M-H]-	Phenolic acids	-
Cajanol	317.1	167.03	316.094	C17H16O6	[M+H]+	Flavonoids	61020-70-0
Persicogenin (5,3'-dihydroxy-7,4'-dimethoxyflavanone)	317.1	167.04	316.095	C17H16O6	[M+H]+	Flavonoids	28590-40-1
Vanilloloside	315.11	153.02	316.116	C14H20O8	[M-H]-	Phenolic acids	74950-96-2
Trans-5-O-(p-Coumaroyl)shikimate*	321.1	147.3	320.09	C16H16O7	[M+H]+	Phenolic acids	-
3-O-p-Coumaroylshikimic acid*	319	145.1	320.09	C16H16O7	[M-H]-	Phenolic acids	-
S-(Methyl)glutathione	322.11	130	321.099	C11H19N3O6S	[M+H]+	Amino acids and derivatives	2922-56-7
Kanzonol D	323.13	267.06	322.121	C20H18O4	[M+H]+	Flavonoids	155233-20-8
(-)-Jasmonoyl-L-Isoleucine	322.4	129.7	323.21	C18H29NO4	[M-H]-	Amino acids and derivatives	120330-93-0
Uridine 5'-monophosphate	323.03	211	324.036	C9H13N2O9P	[M-H]-	Nucleotides and derivatives	58-97-9
Glabranine	325.14	149.03	324.136	C20H20O4	[M+H]+	Flavonoids	41983-91-9
Bavachin	325.14	269.08	324.136	C20H20O4	[M+H]+	Flavonoids	19879-32-4
Glabridin	325.14	269.08	324.136	C20H20O4	[M+H]+	Flavonoids	59870-68-7
Ethyl 9-Hydroxy-10,12-octadecadienoic acid	326.27	309.27	324.266	C20H36O3	[M+H]+	Lipids	-
N-Oleoylethanolamine	326.31	62.06	325.298	C20H39NO2	[M+H]+	Alkaloids	111-58-0
Feruloyltartaric acid (Fertaric acid)	325.06	193.05	326.064	C14H14O9	[M-H]-	Phenolic acids	-
p-Coumaric acid-4-O-glucoside*	325.09	163.04	326.1	C15H18O8	[M-H]-	Phenolic acids	117405-48-8
1-O-[(E)-p-Cumaroyl]-D-glucose*	325.09	163.04	326.1	C15H18O8	[M-H]-	Phenolic acids	-
Ferulic acid-1-O-glucoside	325.09	119.05	326.1	C15H18O8	[M-H]-	Phenolic acids	14364-05-7
Rutinose	325.11	59.01	326.121	C12H22O10	[M-H]-	Others	90-74-4
Acitretin	327.19	159.08	326.188	C21H26O3	[M+H]+	Others	55079-83-9
3-Hydroxy-5,7,8-trimethoxyflavone	329.1	314.07	328.095	C18H16O6	[M+H]+	Flavonoids	103393-10-8
Demethyl coniferin	327.11	165.05	328.116	C15H20O8	[M-H]-	Phenolic acids	-
Androsin	327.11	165.06	328.116	C15H20O8	[M-H]-	Phenolic acids	531-28-2
9,12,13-Trihydroxy-10,15-octadecadienoic acid	327.22	291.2	328.225	C18H32O5	[M-H]-	Lipids	-
Cis-4,7,10,13,16,19-Docosahexaenoic Acid	327.23	283.3	328.24	C22H32O2	[M-H]-	Lipids	6217-54-5
Cyclic 3',5'-Adenylic acid	328.05	134.2	329.053	C10H12N5O6P	[M-H]-	Nucleotides and derivatives	60-92-4
Tricin (5,7,4'-Trihydroxy-3',5'-dimethoxyflavone)	331.08	271.06	330.074	C17H14O7	[M+H]+	Flavonoids	520-32-1
Vanillic acid-4-O-glucoside	329.09	209.04	330.095	C14H18O9	[M-H]-	Phenolic acids	32142-31-7
1-O-Vanilloyl-D-Glucose	329.11	167.03	330.095	C14H18O9	[M-H]-	Phenolic acids	-
3,4,5-Trimethoxyphenyl-1-O-Glucoside	329.12	167	330.131	C15H22O8	[M-H]-	Phenolic acids	-
9,12,13-TriHOME; 9(S),12(S),13(S)-Trihydroxy-10(E)-octadecenoic acid	329.23	211.14	330.241	C18H34O5	[M-H]-	Lipids	97134-11-7
9,10-Dihydroxy-12,13-epoxyoctadecanoic acid	329.23	199.13	330.241	C18H34O5	[M-H]-	Lipids	-
9,10,13-Trihydroxy-11-Octadecenoic Acid	329.23	229.15	330.241	C18H34O5	[M-H]-	Lipids	29907-57-1
Monopalmitin	331.28	313.27	330.277	C19H38O4	[M+H]+	Lipids	542-44-9
2'-Deoxyadenosine-5'-monophosphate	332.08	136	331.068	C10H14N5O6P	[M+H]+	Nucleotides and derivatives	653-63-4
Pyridoxine-5'-O-glucoside	332.13	152.07	331.127	C14H21NO8	[M+H]+	Others	-
1-O-Galloyl-D-glucose	331.07	169.01	332.074	C13H16O10	[M-H]-	Phenolic acids	58511-73-2
2-O-Galloyl-D-glucose	331.07	169.01	332.075	C13H16O10	[M-H]-	Phenolic acids	-
1-(sn-Glycero-3-phospho)-1D-myo-inositol	333.06	333.06	334.067	C9H19O11P	[M-H]-	Others	-
p-Dimeric galloyl methyl ester	335.04	183.03	336.048	C15H12O9	[M-H]-	Phenolic acids	-
Glabrone	337.11	281.08	336.1	C20H16O5	[M+H]+	Flavonoids	60008-02-8
O-Feruloyl 4-hydroxycoumarin	339.09	177.2	338.079	C19H14O6	[M+H]+	Lignans and Coumarins	-
3-O-p-Coumaroylquinic acid*	337.09	191.05	338.1	C16H18O8	[M-H]-	Phenolic acids	87099-71-6
5-O-p-Coumaroylquinic acid*	337.09	191.05	338.1	C16H18O8	[M-H]-	Phenolic acids	1899-30-5
Glyceollin III	337.11	281.05	338.115	C20H18O5	[M-H]-	Flavonoids	61080-23-7
Licochalcone C	339.16	253	338.152	C21H22O4	[M+H]+	Flavonoids	144506-14-9
Cajanine	339.16	235.09	338.152	C21H22O4	[M+H]+	Phenolic acids	87402-84-4
Bavachinin	339.16	271.1	338.152	C21H22O4	[M+H]+	Flavonoids	19879-30-2
D-Fructose-1,6-biphosphate	339	97	339.996	C6H14O12P2	[M-H]-	Others	488-69-7
Esculin (6,7-DihydroxyCoumarin-6-glucoside)*	339.07	177	340.079	C15H16O9	[M-H]-	Lignans and Coumarins	531-75-9
Esculetin-7-O-glucoside*	339.07	177.02	340.079	C15H16O9	[M-H]-	Lignans and Coumarins	-
1-O-[(E)-Caffeoyl]-D-glucose*	341.09	179.04	342.095	C15H18O9	[M-H]-	Phenolic acids	-
Vanillic Acid-4-O-Glucuronide	341.09	161.02	342.095	C15H18O9	[M-H]-	Phenolic acids	-
6-O-Caffeoyl-D-glucose*	341.09	179.03	342.096	C15H18O9	[M-H]-	Phenolic acids	-
Scutellarein tetramethyl ether	343.12	282.09	342.11	C19H18O6	[M+H]+	Flavonoids	1168-42-9
5,7,8,4'-Tetramethoxyflavone	343.12	313.08	342.11	C19H18O6	[M+H]+	Flavonoids	6601-66-7
Lactobiose*	341.11	89.02	342.116	C12H22O11	[M-H]-	Others	63-42-3
D-Maltose*	341.11	89.02	342.116	C12H22O11	[M-H]-	Others	133-99-3
D-Lactulose*	341.11	89.02	342.116	C12H22O11	[M-H]-	Others	4618-18-2
Galactinol*	341.11	179	342.116	C12H22O11	[M-H]-	Others	3687-64-7
Isomaltulose*	341.11	89.02	342.116	C12H22O11	[M-H]-	Others	13718-94-0
Melibiose*	341.11	113	342.116	C12H22O11	[M-H]-	Others	585-99-9
D-Trehalose*	341.11	119	342.116	C12H22O11	[M-H]-	Others	99-20-7
Coniferin	341.12	179	342.131	C16H22O8	[M-H]-	Phenolic acids	531-29-3
Dihydrocaffeoylglucose	343.1	181.05	344.111	C15H20O9	[M-H]-	Phenolic acids	-
Maltitol*	343.12	89.03	344.132	C12H24O11	[M-H]-	Others	585-88-6
Lactitol*	343.12	59.01	344.132	C12H24O11	[M-H]-	Others	585-86-4
Guanosine 3',5'-cyclic monophosphate	344.04	150	345.047	C10H12N5O7P	[M-H]-	Nucleotides and derivatives	7665-99-8
Adenosine 5'-monophosphate	348.07	136	347.063	C10H14N5O7P	[M+H]+	Nucleotides and derivatives	61-19-8
Inosine 5'-monophosphate	349.05	137.3	348.047	C10H13N4O8P	[M+H]+	Nucleotides and derivatives	131-99-7
1-Stearidonoyl-Glycerol	351.25	146.9	350.246	C21H34O4	[M+H]+	Lipids	-
Gancaonin G	351.12	292.99	352.131	C21H20O5	[M-H]-	Flavonoids	126716-34-5
1-α-Linolenoyl-glycerol	353.27	261.22	352.261	C21H36O4	[M+H]+	Lipids	-
2-α-Linolenoyl-glycerol	353.27	261.22	352.261	C21H36O4	[M+H]+	Lipids	55268-58-1
Neochlorogenic acid (5-O-Caffeoylquinic acid)	353.09	191	354.095	C16H18O9	[M-H]-	Phenolic acids	906-33-2
Cryptochlorogenic acid (4-O-Caffeoylquinic acid)	353.09	191.05	354.095	C16H18O9	[M-H]-	Phenolic acids	905-99-7
Chlorogenic acid (3-O-Caffeoylquinic acid)	353.09	191.01	354.095	C16H18O9	[M-H]-	Phenolic acids	327-97-9
Scopoletin-7-O-glucoside (Scopolin)	355.1	193.05	354.095	C16H18O9	[M+H]+	Lignans and Coumarins	531-44-2
8-Prenylkaempferol	355.12	299.06	354.11	C20H18O6	[M+H]+	Flavonoids	28610-31-3
Licoflavonol	355.12	299.06	354.11	C20H18O6	[M+H]+	Flavonoids	60197-60-6
Isoxanthohumol	355.15	179.04	354.147	C21H22O5	[M+H]+	Flavonoids	70872-29-6
2-Linoleoylglycerol	355.28	263.24	354.277	C21H38O4	[M+H]+	Lipids	3443-82-1
1-Linoleoylglycerol	355.28	263.24	354.277	C21H38O4	[M+H]+	Lipids	2277-28-3
Ferulic acid-4-O-glucoside	355.1	193.05	356.111	C16H20O9	[M-H]-	Phenolic acids	117405-51-3
6-O-Feruloyl-D-glucose	355.1	193.05	356.111	C16H20O9	[M-H]-	Phenolic acids	137887-25-3
1-O-Feruloyl-β-D-glucose	355.1	175.04	356.111	C16H20O9	[M-H]-	Phenolic acids	7196-71-6
1-Oleoyl-Sn-Glycerol	357.3	265.4	356.293	C21H40O4	[M+H]+	Lipids	129784-87-8
Altisin*	359.1	344.09	358.105	C19H18O7	[M+H]+	Flavonoids	-
5-Hydroxy-3,7,3',4'-tetramethoxyflavone (Retusin)*	359.11	344.09	358.105	C19H18O7	[M+H]+	Flavonoids	1245-15-4
Dehydrodiconiferyl alcohol	359.15	131.05	358.142	C20H22O6	[M+H]+	Phenolic acids	97465-82-2
Pinoresinol	357.13	151	358.142	C20H22O6	[M-H]-	Lignans and Coumarins	487-36-5
Sudachitin	359.08	329.03	360.085	C18H16O8	[M-H]-	Flavonoids	4281-28-1
Glucosyringic Acid	359.1	182.1	360.106	C15H20O10	[M-H]-	Phenolic acids	-
Guanosine 5'-monophosphate	364.07	152.1	363.058	C10H14N5O8P	[M+H]+	Nucleotides and derivatives	85-32-5
Isopentenyladenine-7-N-glucoside	366.2	204.1	365.17	C16H23N5O5	[M+H]+	Nucleotides and derivatives	-
Isoglycyrol	365.1	350.3	366.11	C21H18O6	[M-H]-	Lignans and Coumarins	23013-86-7
Scopoletin-7-O-glucuronide	369.16	177.06	368.074	C16H16O10	[M+H]+	Lignans and Coumarins	132752-65-9
Chlorogenic acid methyl ester	367.1	190.9	368.111	C17H20O9	[M-H]-	Phenolic acids	29708-87-0
1-O-Feruloylquinic acid	369.1	177.1	368.111	C17H20O9	[M+H]+	Phenolic acids	-
3-O-Feruloylquinic acid	369.12	177.1	368.111	C17H20O9	[M+H]+	Phenolic acids	1899-29-2
Glisoflavone	369.13	313.07	368.126	C21H20O6	[M+H]+	Flavonoids	125709-32-2
Fraxetin-8-O-glucoside (Fraxin)	371.1	209.05	370.09	C16H18O10	[M+H]+	Lignans and Coumarins	524-30-1
Uralenol	371.11	315.08	370.105	C20H18O7	[M+H]+	Flavonoids	139163-15-8
Sinapaldehyde-4-O-Glucoside	371.1	209.05	370.126	C17H22O9	[M+H]+	Phenolic acids	154461-65-1
2'-HydroxyIsoxanthohumol	369.13	207.1	370.142	C21H22O6	[M-H]-	Flavonoids	-
Kenusanone I	369.14	193.09	370.142	C21H22O6	[M-H]-	Flavonoids	-
Trihydroxycinnamoylquinic acid	371.1	249.06	372.106	C16H20O10	[M-H]-	Phenolic acids	-
Sinensetin (5,6,7,3',4'-pentamethoxyflavone)	373.13	312.1	372.121	C20H20O7	[M+H]+	Flavonoids	2306-27-6
3,5,7,3′4′-Pentamethoxyflavone	373.13	343.08	372.121	C20H20O7	[M+H]+	Flavonoids	1247-97-8
Isosinensetin	373.13	343.08	372.121	C20H20O7	[M+H]+	Flavonoids	17290-70-9
Tangeretin (4',5,6,7,8-Pentamethoxyflavone)	373.13	343.09	372.121	C20H20O7	[M+H]+	Flavonoids	481-53-8
Syringin	371.13	209	372.142	C17H24O9	[M-H]-	Phenolic acids	118-34-3
5,4′-Dihydroxy-3,6,7,3′-tetramethoxyflavone	375.11	345.06	374.1	C19H18O8	[M+H]+	Flavonoids	130252-52-7
Riboflavin (Vitamin B2)	377.15	243.09	376.138	C17H20N4O6	[M+H]+	Others	83-88-5
Isolicoricone*	383.15	315.16	382.142	C22H22O6	[M+H]+	Flavonoids	-
Licoricone*	383.15	327.16	382.142	C22H22O6	[M+H]+	Flavonoids	51847-92-8
Cinncassiol A	381.19	235.1	382.199	C20H30O7	[M-H]-	Phenolic acids	73599-11-8
Gancaonin R	383.22	327.16	382.214	C24H30O4	[M+H]+	Phenolic acids	134958-53-5
Succinyladenosine	384.12	252	383.108	C14H17N5O8	[M+H]+	Nucleotides and derivatives	4542-23-8
Fraxidin-8-O-glucoside	385.12	223.06	384.106	C17H20O10	[M+H]+	Lignans and Coumarins	-
1,3-O-Di-p-Coumaroylglycerol	383.12	163.04	384.121	C21H20O7	[M-H]-	Phenolic acids	-
Gancaonin D	385.13	329.06	384.121	C21H20O7	[M+H]+	Flavonoids	124596-88-9
S-(5'-Adenosy)-L-homocysteine	385.13	250	384.122	C14H20N6O5S	[M+H]+	Amino acids and derivatives	979-92-0
4-O-Glucosyl-sinapate	385.11	223.06	386.121	C17H22O10	[M-H]-	Phenolic acids	-
1-O-Glucosyl sinapate	385.11	205	386.121	C17H22O10	[M-H]-	Phenolic acids	78185-48-5
Artemetin (5-Hydroxy-3,3',4',6,7-pentamethoxyflavone)*	389.12	331.08	388.116	C20H20O8	[M+H]+	Flavonoids	479-90-3
5-Hydroxy-6,7,8,3',4'-pentamethoxyflavone*	389.12	359.08	388.116	C20H20O8	[M+H]+	Flavonoids	2174-59-6
5'-Glucosyloxyjasmanic acid	387.17	207.1	388.174	C18H28O9	[M-H]-	Phenolic acids	-
Piceid	389.12	227.08	390.131	C20H22O8	[M-H]-	Others	27208-80-6
Diisooctyl Phthalate	391.28	149.02	390.277	C24H38O4	[M+H]+	Phenolic acids	27554-26-3
Bis(2-ethylhexyl)phthalate	391.28	149.02	390.277	C24H38O4	[M+H]+	Phenolic acids	117-81-7
N-Glucosyl-p-coumaroylputrescine	397.2	147.04	396.19	C19H28N2O7	[M+H]+	Alkaloids	-
4-O-Sinapoylquinic acid	399	207.2	398.121	C18H22O10	[M+H]+	Phenolic acids	-
Ribosyladenosine	400.15	136.11	399.139	C15H21N5O8	[M+H]+	Nucleotides and derivatives	-
S-Adenosylmethionine	400.14	251	399.145	C15H23N6O5S	[M+H]+	Amino acids and derivatives	485-80-3
Sinapoylglucuronic acid	399.09	205.04	400.101	C17H20O11	[M-H]-	Phenolic acids	-
Nobiletin (5,6,7,8,3',4'-Hexamethoxyflavone)	403.14	373.1	402.131	C21H22O8	[M+H]+	Flavonoids	478-01-3
Benzyl-(2''-O-xylosyl)glucoside	401.14	269.1	402.153	C18H26O10	[M-H]-	Phenolic acids	-
Delta-Tocopherol	403.36	373.1	402.35	C27H46O2	[M+H]+	Others	119-13-1
Uridine 5'-diphosphate	402.99	159	404.002	C9H14N2O12P2	[M-H]-	Nucleotides and derivatives	27821-45-0
Lancerin	405.08	285	406.09	C19H18O10	[M-H]-	Phenolic acids	81991-99-3
2,3,5,4'-Tetrahydroxystilbene-2-O-glucoside	405.12	243.1	406.126	C20H22O9	[M-H]-	Others	-
2,4,6,4'-Tetrahydroxy-stilbene-2-O-glucoside	405.12	243.1	406.126	C20H22O9	[M-H]-	Others	-
Piceatannol-3'-O-glucoside	405.12	243.07	406.127	C20H22O9	[M-H]-	Others	94356-26-0
N-p-Coumaroyl-N'-feruloylputrescine	411.19	177.05	410.184	C23H26N2O5	[M+H]+	Alkaloids	380302-96-5
Caffeoylbenzoyltartaric acid	415.07	179.03	416.074	C20H16O10	[M-H]-	Phenolic acids	-
Daidzein-7-O-glucoside(Daidzin)	417.12	255	416.111	C21H20O9	[M+H]+	Flavonoids	552-66-9
Monohydroxy-hexamethoxyflavone	419.13	404.1	418.126	C21H22O9	[M+H]+	Flavonoids	-
Liquiritigenin-4'-O-Glucoside (Liquiritin)*	419.13	257.08	418.126	C21H22O9	[M+H]+	Flavonoids	551-15-5
Isoliquiritin*	419.13	257.08	418.126	C21H22O9	[M+H]+	Flavonoids	5041-81-6
Lirioresinol A	417.15	181.04	418.162	C22H26O8	[M-H]-	Lignans and Coumarins	21453-71-4
Syringaresinol	417.16	402.1	418.163	C22H26O8	[M-H]-	Lignans and Coumarins	21453-69-0
Sucrose-6-phosphate	421.1	241	422.083	C12H23O14P	[M-H]-	Others	-
Trehalose 6-phosphate	421.08	241.1	422.083	C12H23O14P	[M-H]-	Others	4484-88-2
Grandidentatin	425.18	147.04	424.173	C21H28O9	[M+H]+	Phenolic acids	15732-48-6
LysoPE 14:0(2n isomer)	426.26	285.24	425.254	C19H40NO7P	[M+H]+	Lipids	-
LysoPE 14:0	426.26	285.24	425.254	C19H40NO7P	[M+H]+	Lipids	-
p-Coumaroylcinnamoyltartaric acid	425.09	277.03	426.095	C22H18O9	[M-H]-	Phenolic acids	-
Taraxerol	427.39	409.38	426.386	C30H50O	[M+H]+	Terpenoids	127-22-0
Adenosine 5'-diphosphate	426	159	427.029	C10H15N5O10P2	[M-H]-	Nucleotides and derivatives	58-64-0
Benzoylferuloyltartaric acid	429.08	193.05	430.09	C21H18O10	[M-H]-	Phenolic acids	-
Formononetin-7-O-glycoside (Ononin)	431.13	269.08	430.126	C22H22O9	[M+H]+	Flavonoids	486-62-4
Caffeoyl(p-Hydroxybenzoyl)tartaric acid	431.06	137.03	432.069	C20H16O11	[M-H]-	Phenolic acids	-
Genistein-7-O-Glucoside (Genistin)	431.1	269	432.106	C21H20O10	[M-H]-	Flavonoids	529-59-9
Genistein-7-O-galactoside	433.11	271.06	432.106	C21H20O10	[M+H]+	Flavonoids	-
Licoagroside B	431.12	125.03	432.126	C18H24O12	[M-H]-	Others	-
3,5,6,7,8,3',4'-Heptamethoxyflavone	433.15	403.11	432.142	C22H24O9	[M+H]+	Flavonoids	1178-24-1
Benzyl-(2''-O-glucosyl)glucoside*	431.15	269.1	432.163	C19H28O11	[M-H]-	Phenolic acids	-
Benzyl-β-gentiobioside*	431.16	269.1	432.163	C19H28O11	[M-H]-	Phenolic acids	56775-64-5
Avicularin(Quercetin-3-O-α-L-arabinofuranoside)	435.09	303	434.085	C20H18O11	[M+H]+	Flavonoids	572-30-5
Isohemiphloin	433.11	313	434.121	C21H22O10	[M-H]-	Flavonoids	3682-02-8
Robustaside B;[6'-O-Caffeoylarbutin]	433.11	161.03	434.121	C21H22O10	[M-H]-	Phenolic acids	136172-60-6
N1,N10-Bis(p-coumaroyl)spermidine	438.24	147.04	437.231	C25H31N3O4	[M+H]+	Alkaloids	114916-05-1
LysoPE 15:1	438.26	297.24	437.254	C20H40NO7P	[M+H]+	Lipids	-
LysoPE 15:1(2n isomer)	438.26	297.24	437.254	C20H40NO7P	[M+H]+	Lipids	-
7-Methyllicoricidin	439.25	383.15	438.241	C27H34O5	[M+H]+	Others	-
LysoPC 12:0	440.28	184.07	439.27	C20H42NO7P	[M+H]+	Lipids	20559-18-6
LysoPE 15:0(2n isomer)	440.28	299.26	439.27	C20H42NO7P	[M+H]+	Lipids	-
LysoPE 15:0	440.28	299.26	439.27	C20H42NO7P	[M+H]+	Lipids	-
Ursolaldehyde	441.37	191.18	440.365	C30H48O2	[M+H]+	Terpenoids	-
Bis(p-Coumaroyl)tartaric acid	441.08	295.05	442.09	C22H18O10	[M-H]-	Phenolic acids	-
Myricadoil	443.39	425.37	442.381	C30H50O2	[M+H]+	Terpenoids	-
Betulin	443.39	425.38	442.381	C30H50O2	[M+H]+	Terpenoids	473-98-3
Menatetrenone (Vitamin K2)	445.3	341.3	444.303	C31H40O2	[M+H]+	Others	11032-49-8
Glycitin	447.13	285.08	446.121	C22H22O10	[M+H]+	Flavonoids	40246-10-4
Biochanin A-7-O-glucoside (Sissotrin)	447.13	285	446.121	C22H22O10	[M+H]+	Flavonoids	5928-26-7
3'-Methoxydaidzin	447.13	285.07	446.121	C22H22O10	[M+H]+	Flavonoids	200127-80-6
Calycosin-7-O-beta-D-glucoside	447.13	285.09	446.121	C22H22O10	[M+H]+	Flavonoids	20633-67-4
LysoPE 16:3	448.25	307.23	447.239	C21H38NO7P	[M+H]+	Lipids	-
Luteolin-3'-O-glucoside*	449.11	287.06	448.101	C21H20O11	[M+H]+	Flavonoids	5154-41-6
Kaempferol-3-O-glucoside (Astragalin)*	449.11	287.06	448.101	C21H20O11	[M+H]+	Flavonoids	480-10-4
Kaempferol-3-O-galactoside (Trifolin)*	447.09	285	448.101	C21H20O11	[M-H]-	Flavonoids	23627-87-4
Quercetin-3-O-rhamnoside(Quercitrin)	449.11	303.05	448.101	C21H20O11	[M+H]+	Flavonoids	522-12-3
Luteolin-7-O-glucoside (Cynaroside)	449.11	287.2	448.101	C21H20O11	[M+H]+	Flavonoids	5373-11-5
Luteolin-4'-O-glucoside*	449.11	287.05	448.101	C21H20O11	[M+H]+	Flavonoids	6920-38-3
Amoenin	449.11	287.06	448.101	C21H20O11	[M+H]+	Flavonoids	-
Kaempferol-7-O-glucoside*	447.09	285.04	448.101	C21H20O11	[M-H]-	Flavonoids	16290-07-6
Aromadendrin-7-O-glucoside	449.1	287.05	450.116	C21H22O11	[M-H]-	Flavonoids	28189-90-4
Eriodictyol-7-O-glucoside	451.12	289	450.116	C21H22O11	[M+H]+	Flavonoids	38965-51-4
6-C-Glucosyl-2-Hydroxynaringenin	449.11	269.05	450.116	C21H22O11	[M-H]-	Flavonoids	-
Phylloquinone (Vitamin K1)	451.36	89.06	450.35	C31H46O2	[M+H]+	Others	84-80-0
LysoPE 16:1	452.28	311.26	451.27	C21H42NO7P	[M+H]+	Lipids	-
LysoPE 16:1(2n isomer)	452.28	311.26	451.27	C21H42NO7P	[M+H]+	Lipids	-
Maleoyl-caffeoylquinic acid	451.09	391.04	452.095	C20H20O12	[M-H]-	Phenolic acids	-
2-O-Salicyl-6-O-Galloyl-D-Glucose	451.09	313.05	452.095	C20H20O12	[M-H]-	Phenolic acids	-
Epicatechin glucoside	451.12	289.07	452.131	C21H24O11	[M-H]-	Flavonoids	-
Epicatechin-4'-O-β-D-glucopyranoside	451.13	289.07	452.132	C21H24O11	[M-H]-	Flavonoids	-
Epicatechin-3'-O-β-D-glucopyranoside	451.13	289.07	452.132	C21H24O11	[M-H]-	Flavonoids	-
LysoPE 16:0(2n isomer)	454.29	313.27	453.286	C21H44NO7P	[M+H]+	Lipids	-
LysoPE 16:0	454.29	313.27	453.286	C21H44NO7P	[M+H]+	Lipids	53862-35-4
3-Ketoursolic acid*	453.34	453.34	454.345	C30H46O3	[M-H]-	Terpenoids	-
Betulonic acid*	453.35	453.35	454.345	C30H46O3	[M-H]-	Terpenoids	4481-62-3
Ursonic acid*	453.34	453.34	454.345	C30H46O3	[M-H]-	Terpenoids	6246-46-4
Flavin Single Nucleotide(FMN)	455.1	96.97	456.105	C17H21N4O9P	[M-H]-	Nucleotides and derivatives	6184-17-4
Cinnamoylferuloyltartaric acid	455.1	233.04	456.106	C23H20O10	[M-H]-	Phenolic acids	-
Ursolic acid	455.35	455.35	456.36	C30H48O3	[M-H]-	Terpenoids	77-52-1
3-Epiursolic acid	455.36	455.36	456.36	C30H48O3	[M-H]-	Terpenoids	989-30-0
Betulinic acid	455.36	455.36	456.36	C30H48O3	[M-H]-	Terpenoids	472-15-1
24,30-Dihydroxy-12(13)-enolupinol	455.35	455.35	456.36	C30H48O3	[M-H]-	Terpenoids	-
Soyasapogenol E	455.35	455.35	456.36	C30H48O3	[M-H]-	Terpenoids	6750-59-0
L-Aspartic acid-O-diglucoside	458.1	116.3	457.143	C16H27NO14	[M+H]+	Amino acids and derivatives	-
Caffeoyl-p-coumaroyltartaric acid	457.08	295.04	458.085	C22H18O11	[M-H]-	Phenolic acids	-
Soyasapogenol B	457.37	375.1	458.376	C30H50O3	[M-H]-	Terpenoids	595-15-3
6,4'-Dimethoxyisoflavone-7-O-glucoside (Wistin)	461.14	299.09	460.137	C23H24O10	[M+H]+	Flavonoids	19046-26-5
Anthranilate-1-O-Sophoroside	460.1	117.9	461.153	C19H27NO12	[M-H]-	Phenolic acids	-
Vnilloylcaffeoyltartaric acid	461.07	167.04	462.08	C21H18O12	[M-H]-	Phenolic acids	-
Diosmetin-7-O-galactoside	463.12	301.07	462.116	C22H22O11	[M+H]+	Flavonoids	-
Ellagic acid-4-O-glucoside	463.05	300.99	464.06	C20H16O13	[M-H]-	Tannins	-
6-Hydroxyluteolin 5-glucoside	463.09	301.03	464.095	C21H20O12	[M-H]-	Flavonoids	-
Quercetin-3-O-galactoside (Hyperin)*	463.09	300	464.095	C21H20O12	[M-H]-	Flavonoids	482-36-0
Quercetin-3-O-glucoside (Isoquercitrin)*	463.09	300.03	464.095	C21H20O12	[M-H]-	Flavonoids	482-35-9
6-Hydroxykaempferol-7-O-glucoside	465.1	303.1	464.095	C21H20O12	[M+H]+	Flavonoids	-
Isohyperoside*	465.1	303.06	464.095	C21H20O12	[M+H]+	Flavonoids	35589-21-0
LysoPE 17:1	466.29	325.27	465.286	C22H44NO7P	[M+H]+	Lipids	-
LysoPE 17:1(2n isomer)	466.29	325.27	465.286	C22H44NO7P	[M+H]+	Lipids	-
LysoPE 17:0	468.31	327.29	467.301	C22H46NO7P	[M+H]+	Lipids	-
LysoPC 14:0	468.31	184.07	467.301	C22H46NO7P	[M+H]+	Lipids	20559-16-4
Galloylisorhamnetin	469.13	317.08	468.069	C23H16O11	[M+H]+	Flavonoids	-
Cimifugin-7-O-glucoside	469.17	307.12	468.163	C22H28O11	[M+H]+	Others	80681-45-4
N-(4'-O-glycosyl)-feruloyl agmatine	469.23	177.05	468.222	C21H32N4O8	[M+H]+	Alkaloids	-
Camaldulenic acid	469.33	469.33	470.34	C30H46O4	[M-H]-	Terpenoids	71850-15-2
p-Coumaroylferuloyltartaric acid	471.09	277.04	472.101	C23H20O11	[M-H]-	Phenolic acids	-
2-Hydroxyoleanolic acid*	471.35	471.35	472.355	C30H48O4	[M-H]-	Terpenoids	26707-60-8
2α-Hydroxyursolic acid*	471.35	471.35	472.355	C30H48O4	[M-H]-	Terpenoids	-
Corosolic acid*	471.35	471.35	472.355	C30H48O4	[M-H]-	Terpenoids	4547-24-4
Maslinic acid*	471.35	471.35	472.355	C30H48O4	[M-H]-	Terpenoids	4373-41-5
Chicoric Acid	473.07	149.01	474.08	C22H18O12	[M-H]-	Phenolic acids	70831-56-0
LysoPE 18:3	476.28	335.26	475.27	C23H42NO7P	[M+H]+	Lipids	-
LysoPE 18:3(2n isomer)	476.28	335.26	475.27	C23H42NO7P	[M+H]+	Lipids	-
Diosmetin-7-O-glucuronide	477.1	301.07	476.095	C22H20O12	[M+H]+	Flavonoids	35110-20-4
Pectolinarigenin-7-O-glucoside	477.14	315.09	476.132	C23H24O11	[M+H]+	Flavonoids	-
5,2'-Dihydroxy-7,8-dimethoxyflavone glycosides	477.14	315.08	476.132	C23H24O11	[M+H]+	Flavonoids	-
Cistanoside E	475.18	113.03	476.189	C21H32O12	[M-H]-	Phenolic acids	97400-08-3
LysoPE 18:2(2n isomer)	478.29	337.27	477.286	C23H44NO7P	[M+H]+	Lipids	-
LysoPE 18:2	478.29	337.27	477.286	C23H44NO7P	[M+H]+	Lipids	-
Quercetin-4′-O-glucuronide	477.07	301.04	478.075	C21H18O13	[M-H]-	Flavonoids	201463-36-7
Isorhamnetin-7-O-glucoside (Brassicin)*	479.12	317.06	478.111	C22H22O12	[M+H]+	Flavonoids	6743-96-0
Rhamnetin-3-O-Glucoside*	479.12	317.07	478.111	C22H22O12	[M+H]+	Flavonoids	27875-34-9
LysoPE 18:1(2n isomer)	480.31	339.29	479.301	C23H46NO7P	[M+H]+	Lipids	-
LysoPE 18:1	480.31	339.29	479.301	C23H46NO7P	[M+H]+	Lipids	89576-29-4
LysoPC 15:1	480.31	184.07	479.301	C23H46NO7P	[M+H]+	Lipids	-
LysoPE 18:0(2n isomer)	482.32	341.31	481.317	C23H48NO7P	[M+H]+	Lipids	-
LysoPE 18:0	482.32	341.31	481.317	C23H48NO7P	[M+H]+	Lipids	69747-55-3
LysoPC 15:0(2n isomer)	482.32	184.07	481.317	C23H48NO7P	[M+H]+	Lipids	-
LysoPC 15:0	482.32	184.07	481.317	C23H48NO7P	[M+H]+	Lipids	108273-89-8
Cistanoside F	487.15	179.03	488.152	C21H28O13	[M-H]-	Phenolic acids	97411-47-7
Solatriose	487.17	341.11	488.174	C18H32O15	[M-H]-	Others	528-40-5
Kaempferol-3-O-(2''-acetyl)glucoside	491.12	287.05	490.111	C23H22O12	[M+H]+	Flavonoids	-
Anisic acid-O-feruloyl glucoside	491.15	329	490.148	C24H26O11	[M+H]+	Phenolic acids	-
Cimicifugamide A	492.19	145	491.179	C24H29NO10	[M+H]+	Alkaloids	-
LysoPC 16:2(2n isomer)	492.31	184.07	491.301	C24H46NO7P	[M+H]+	Lipids	-
LysoPC 16:2	492.31	184.07	491.301	C24H46NO7P	[M+H]+	Lipids	-
LysoPC 16:1(2n isomer)	494.32	184.07	493.317	C24H48NO7P	[M+H]+	Lipids	-
LysoPC 16:1	494.32	184.07	493.317	C24H48NO7P	[M+H]+	Lipids	76790-27-7
Laricitrin-3-O-glucoside	495.11	333.07	494.105	C22H22O13	[M+H]+	Flavonoids	39986-90-8
LysoPC 16:0	496.34	184.07	495.332	C24H50NO7P	[M+H]+	Lipids	17364-16-8
LysoPC 16:0(2n isomer)	496.34	184.07	495.332	C24H50NO7P	[M+H]+	Lipids	-
LysoPE 20:4(2n isomer)	502.29	361.27	501.286	C25H44NO7P	[M+H]+	Lipids	-
6''-O-Malonyldaidzin	503.12	255.06	502.111	C24H22O12	[M+H]+	Flavonoids	124590-31-4
p-Coumaroylsinapoyltartaric acid	501.1	277.03	502.111	C24H22O12	[M-H]-	Phenolic acids	-
Sinapoyl-p-coumaroyltartaric acid	501.1	337.05	502.111	C24H22O12	[M-H]-	Phenolic acids	-
Feruloylferuloyltartaric acid	501.1	307.05	502.111	C24H22O12	[M-H]-	Phenolic acids	-
Kaempferol-3-O-(2''-O-acetyl)glucuronide	503.08	459.1	504.09	C23H20O13	[M-H]-	Flavonoids	-
Pinocembrin-7-O-(6''-O-malonyl)glucoside	505.12	257.08	504.126	C24H24O12	[M+H]+	Flavonoids	-
1,6-Di-O-caffeoyl-β-D-glucose*	503.12	179.03	504.127	C24H24O12	[M-H]-	Phenolic acids	-
3,6-Di-O-caffeoyl glucose*	503.12	179.04	504.127	C24H24O12	[M-H]-	Phenolic acids	-
Manninotriose	503.16	383.12	504.169	C18H32O16	[M-H]-	Others	13382-86-0
Maltotriose	527.16	365.1	504.169	C18H32O16	[M+Na]+	Others	1109-28-0
Cimicifugamide	506.2	145	505.195	C25H31NO10	[M+H]+	Alkaloids	-
LysoPC 17:2	506.32	184.07	505.317	C25H48NO7P	[M+H]+	Lipids	-
LysoPE 20:2	506.32	365.31	505.317	C25H48NO7P	[M+H]+	Lipids	-
LysoPE 20:2(2n isomer)	506.32	365.31	505.317	C25H48NO7P	[M+H]+	Lipids	-
ATP; Adenosine 5'-Triphosphate	505.99	158.93	506.996	C10H16N5O13P3	[M-H]-	Nucleotides and derivatives	56-65-5
LysoPC 17:1	508.34	184.07	507.332	C25H50NO7P	[M+H]+	Lipids	-
LysoPC 17:0(2n isomer)	510.36	184.07	509.348	C25H52NO7P	[M+H]+	Lipids	-
LysoPC 17:0	510.36	184.07	509.348	C25H52NO7P	[M+H]+	Lipids	50930-23-9
1-α-Linolenoyl-glycerol-3-O-glucoside	515.32	261.22	514.314	C27H46O9	[M+H]+	Lipids	-
2-α-Linolenoyl-glycerol-1-O-glucoside	515.32	261.22	514.314	C27H46O9	[M+H]+	Lipids	-
LysoPC 18:4	516.3	184.07	515.297	C26H46NO7P	[M+H]+	Lipids	-
Isochlorogenic acid B	515.12	353.09	516.127	C25H24O12	[M-H]-	Phenolic acids	14534-61-3
Formononetin-7-O-(6''-Malonyl)glucoside	517.13	269.09	516.127	C25H24O12	[M+H]+	Flavonoids	-
1,3-O-Dicaffeoylquinic Acid (Cynarin)	515.12	191.05	516.127	C25H24O12	[M-H]-	Phenolic acids	30964-13-7
2-Linoleoylglycerol-1-O-glucoside	517.34	263.24	516.33	C27H48O9	[M+H]+	Lipids	-
LysoPC 18:3	518.32	184.07	517.317	C26H48NO7P	[M+H]+	Lipids	-
LysoPC 18:3(2n isomer)	518.32	184.07	517.317	C26H48NO7P	[M+H]+	Lipids	-
Genistein-7-O-(6''-malonyl)glucoside	519.11	271.06	518.106	C24H22O13	[M+H]+	Flavonoids	-
Sinapoylcaffeoyltartaric acid	517.1	223.06	518.106	C24H22O13	[M-H]-	Phenolic acids	-
6''-O-Malonylgenistin	519.11	271.05	518.106	C24H22O13	[M+H]+	Flavonoids	51011-05-3
6'-O-Feruloyl-D-sucrose	517.16	175.04	518.164	C22H30O14	[M-H]-	Phenolic acids	118230-77-6
LysoPC 18:2(2n isomer)	520.34	184.07	519.332	C26H50NO7P	[M+H]+	Lipids	-
LysoPC 18:2	520.34	184.07	519.332	C26H50NO7P	[M+H]+	Lipids	-
Isorhamnetin-3-O-(6''-acetylglucoside)	519.11	315.05	520.122	C24H24O13	[M-H]-	Flavonoids	-
Pinoresinol-4-O-glucoside	519.19	357.14	520.194	C26H32O11	[M-H]-	Lignans and Coumarins	41607-20-9
Dehydrodiconiferyl alcohol-gamma'-O-glucoside	521.2	131.05	520.194	C26H32O11	[M+H]+	Phenolic acids	-
LysoPC 18:1(2n isomer)	522.36	184.07	521.348	C26H52NO7P	[M+H]+	Lipids	-
LysoPC 18:1	522.36	184.07	521.348	C26H52NO7P	[M+H]+	Lipids	-
Tricin-7-O-saccharic acid	521.09	329.2	522.101	C23H22O14	[M-H]-	Flavonoids	-
Rosmarinic acid-3'-O-glucoside	521.13	359.08	522.137	C24H26O13	[M-H]-	Phenolic acids	910028-78-3
Isolariciresinol-9-O-glucoside	523.23	137.06	522.21	C26H34O11	[M+H]+	Lignans and Coumarins	-
Lariciresinol-4'-O-glucoside	521.2	359.15	522.211	C26H34O11	[M-H]-	Lignans and Coumarins	143663-00-7
LysoPC 18:0	524.37	184.07	523.364	C26H54NO7P	[M+H]+	Lipids	19420-57-6
LysoPC 18:0(2n isomer)	524.37	184.07	523.364	C26H54NO7P	[M+H]+	Lipids	-
Secoisolariciresinol 4-O-glucoside	523.21	361.14	524.226	C26H36O11	[M-H]-	Lignans and Coumarins	-
LysoPE 22:5	528.31	387.29	527.301	C27H46NO7P	[M+H]+	Lipids	-
LysoPC 19:3	532.34	184.07	531.332	C27H50NO7P	[M+H]+	Lipids	-
6''-O-Malonylglycitin	533.13	285.07	532.122	C25H24O13	[M+H]+	Flavonoids	137705-39-6
Feruloylsinapoyltartaric acid	531.12	337.06	532.122	C25H24O13	[M-H]-	Phenolic acids	-
Fraxetin-7,8-di-O-glucoside	531.14	531.13	532.143	C22H28O15	[M-H]-	Lignans and Coumarins	-
LysoPC 19:2(2n isomer)	534.36	184.07	533.348	C27H52NO7P	[M+H]+	Lipids	-
LysoPC 19:2	534.36	184.07	533.348	C27H52NO7P	[M+H]+	Lipids	-
Kaempferol-3-O-(6''-malonyl)galactoside*	535.11	287.05	534.101	C24H22O14	[M+H]+	Flavonoids	-
Kaempferol-3-O-(6''-malonyl)glucoside*	535.11	287.05	534.101	C24H22O14	[M+H]+	Flavonoids	-
LysoPC 19:1	536.37	184.07	535.364	C27H54NO7P	[M+H]+	Lipids	-
Uridine-5'-Diphosphate-D-Xylose	535.04	323.03	536.044	C14H22N2O16P2	[M-H]-	Nucleotides and derivatives	3616-06-6
Olivil-4'-O-glucoside	537.2	375.15	538.205	C26H34O12	[M-H]-	Lignans and Coumarins	76880-93-8
LysoPC 20:5	542.32	184.07	541.317	C28H48NO7P	[M+H]+	Lipids	162440-04-2
LysoPC 20:4	544.34	184.07	543.332	C28H50NO7P	[M+H]+	Lipids	-
LysoPC 20:3	546.36	184.07	545.348	C28H52NO7P	[M+H]+	Lipids	1199257-41-4
LysoPC 20:2(2n isomer)	548.37	184.07	547.364	C28H54NO7P	[M+H]+	Lipids	-
Chrysoeriol-7-O-(6''-malonyl)glucoside	549.12	301.4	548.117	C25H24O14	[M+H]+	Flavonoids	-
Kaempferide-3-O-(6''-malonyl)glucoside	549.12	301.07	548.117	C25H24O14	[M+H]+	Flavonoids	-
Furanofructosyl-α-D-(3-mustard acyl)glucoside*	547.17	223.1	548.174	C23H32O15	[M-H]-	Phenolic acids	-
Furanofructosyl-α-D-(6-mustard acyl)glucoside*	547.17	223.1	548.174	C23H32O15	[M-H]-	Phenolic acids	-
LysoPC 20:1	550.39	184.07	549.379	C28H56NO7P	[M+H]+	Lipids	-
Hesperetin-7-O-(6''-malonyl)glucoside	549.12	387.1	550.132	C25H26O14	[M-H]-	Flavonoids	-
LysoPC 20:0(2n isomer)	552.4	184.07	551.395	C28H58NO7P	[M+H]+	Lipids	-
LysoPC 20:0	552.4	184.07	551.395	C28H58NO7P	[M+H]+	Lipids	108341-80-6
Sinapoylsinapoyltartaric acid	561.13	337.06	562.132	C26H26O14	[M-H]-	Phenolic acids	-
Glycyroside	563.18	269.08	562.169	C27H30O13	[M+H]+	Flavonoids	125310-04-5
Pinoresinol-4-O-(6''-acetyl)glucoside	561.2	357.13	562.205	C28H34O12	[M-H]-	Lignans and Coumarins	-
Isorhamnetin-3-O-(6''-malonylglucoside)	565.12	317.08	564.088	C25H24O15	[M+H]+	Flavonoids	-
Uridine 5'-diphospho-D-glucose	565.05	323.1	566.055	C15H24N2O17P2	[M-H]-	Nucleotides and derivatives	133-89-1
LysoPC 22:6	568.34	184.07	567.332	C30H50NO7P	[M+H]+	Lipids	-
LysoPC 22:5	570.36	184.07	569.348	C30H52NO7P	[M+H]+	Lipids	-
LysoPC 22:5(2n isomer)	570.36	184.07	569.348	C30H52NO7P	[M+H]+	Lipids	-
LysoPC 22:4	572.37	184.07	571.364	C30H54NO7P	[M+H]+	Lipids	-
Procyanidin A3	577.13	425.3	576.127	C30H24O12	[M+H]+	Tannins	86631-39-2
Uridine-5'-diphosphoglucuronic acid	578.9	402.6	580.034	C15H22N2O18P2	[M-H]-	Nucleotides and derivatives	-
Naringenin-7-O-Rutinoside(Narirutin)	579.17	271	580.179	C27H32O14	[M-H]-	Flavonoids	14259-46-2
Syringaresinol-4'-O-glucoside	579.21	417.16	580.216	C28H36O13	[M-H]-	Lignans and Coumarins	7374-79-0
N',N'',N'''-p-Coumaroyl-cinnamoyl-caffeoyl spermidine	584.28	325	583.268	C34H37N3O6	[M+H]+	Alkaloids	-
Luteolin-7-O-neohesperidoside (Lonicerin)*	595.17	449.1	594.158	C27H30O15	[M+H]+	Flavonoids	25694-72-8
Apigenin-6,8-di-C-glucoside (Vicenin-2)	595.17	457.2	594.158	C27H30O15	[M+H]+	Flavonoids	23666-13-9
Kaempferol-3-O-neohesperidoside*	595.17	287.05	594.158	C27H30O15	[M+H]+	Flavonoids	32602-81-6
5,7-Dihydroxy-4-methoxyflavone-3-O-xylose-(1-6)-glucose	595.19	127.04	594.158	C27H30O15	[M+H]+	Flavonoids	-
Luteolin-7-O-rutinoside*	595.17	449.1	594.158	C27H30O15	[M+H]+	Flavonoids	3563-98-2
Kaempferol-3-O-robinobioside(Biorobin)*	593.15	285	594.158	C27H30O15	[M-H]-	Flavonoids	17297-56-2
Kaempferol-3-O-rutinoside(Nicotiflorin)*	593.15	285.04	594.158	C27H30O15	[M-H]-	Flavonoids	17650-84-9
Trans-arachidin-caffeoylrhamnoside	603.22	277.04	604.231	C34H36O10	[M-H]-	Others	-
Uridine 5'-diphospho-N-acetylglucosamine	606.08	384.98	607.082	C17H27N3O17P2	[M-H]-	Nucleotides and derivatives	528-04-1
Chrysoeriol-7-O-rutinoside	607.17	299	608.174	C28H32O15	[M-H]-	Flavonoids	-
Gallocatechin-(4α→8)-gallocatechin	611.14	287.05	610.132	C30H26O14	[M+H]+	Flavonoids	-
Luteolin-7,3'-di-O-glucoside*	611.16	287.06	610.153	C27H30O16	[M+H]+	Flavonoids	52187-80-1
Quercetin-3-O-glucoside-7-O-rhamnoside	611.16	303.05	610.153	C27H30O16	[M+H]+	Flavonoids	-
Quercetin-3-O-rutinoside (Rutin)*	609.15	301	610.153	C27H30O16	[M-H]-	Flavonoids	153-18-4
Luteolin-7-O-gentiobioside*	611.16	287.05	610.153	C27H30O16	[M+H]+	Flavonoids	-
Quercetin-3-O-robinobioside*	609.15	300	610.153	C27H30O16	[M-H]-	Flavonoids	52525-35-6
Hesperetin-7-O-rutinoside (Hesperidin)*	609.18	301.09	610.19	C28H34O15	[M-H]-	Flavonoids	520-26-3
Hesperetin-7-O-neohesperidoside(Neohesperidin)*	609.18	301	610.19	C28H34O15	[M-H]-	Flavonoids	13241-33-3
Oxiglutatione	611.14	306.08	612.152	C20H32N6O12S2	[M-H]-	Amino acids and derivatives	27025-41-8
Syringaresinol-4'-O-(6''-acetyl)glucoside	621.22	417.16	622.226	C30H38O14	[M-H]-	Lignans and Coumarins	-
Chrysoeriol-5,7-di-O-glucoside	625.17	301.07	624.168	C28H32O16	[M+H]+	Flavonoids	-
Isorhamnetin-3-O-neohespeidoside*	625.17	317.07	624.169	C28H32O16	[M+H]+	Flavonoids	55033-90-4
2'-Hydoxy,5-methoxyGenistein-O-rhamnosyl-glucoside	625.17	317.06	624.169	C28H32O16	[M+H]+	Flavonoids	-
Isorhamnetin-3-O-rutinoside (Narcissin)*	625.18	317.08	624.169	C28H32O16	[M+H]+	Flavonoids	604-80-8
Quercetin-3,4'-O-di-glucoside	627.16	465	626.148	C27H30O17	[M+H]+	Flavonoids	29125-80-2
6-Hydroxykaempferol-3,6-O-Diglucoside	627.16	303.1	626.148	C27H30O17	[M+H]+	Flavonoids	-
6-Hydroxykaempferol-7,6-O-Diglucoside	627.16	303.1	626.148	C27H30O17	[M+H]+	Flavonoids	-
Hesperetin-8-C-glucoside-3'-O-glucoside	627.19	465.1	626.185	C28H34O16	[M+H]+	Flavonoids	-
Soyasapogenol B-3-O-glucuronide	635.42	423.36	634.408	C36H58O9	[M+H]+	Terpenoids	-
PE(oxo-11:0/16:0)	636.41	495.4	635.414	C32H62NO9P	[M+H]+	Lipids	-
Chrysoeriol-7-O-(2''-O-glucuronyl)glucoside	639.16	477	638.148	C28H30O17	[M+H]+	Flavonoids	-
Cistanoside C	639.23	163	638.221	C30H38O15	[M+H]+	Phenolic acids	94492-22-5
2-O-Di-gallic acyl-Glucoside-Glucoside	645.13	169	646.138	C26H30O19	[M-H]-	Phenolic acids	-
Syringetin-3-O-rutinoside	655.19	347.08	654.18	C29H34O17	[M+H]+	Flavonoids	-
Nicotinic acid adenine dinucleotide	664.12	136.2	663.109	C21H27N7O14P2	[M+H]+	Nucleotides and derivatives	53-84-9
O-Caffeoyl maltotriose	665.1	218.1	666.201	C27H38O19	[M-H]-	Phenolic acids	-
2-α-Linolenoyl-glycerol-1,3-di-O-glucoside	677.37	261.22	676.367	C33H56O14	[M+H]+	Lipids	-
1-Linolenoyl-rac-glycerol-diglucoside	677.37	677.37	676.367	C33H56O14	[M+H]+	Lipids	-
1-α-Linolenoyl-glycerol-2,3-di-O-glucoside	677.37	261.22	676.367	C33H56O14	[M+H]+	Lipids	-
3,4,5-Tricaffeoylquinic acid	677.17	515.14	678.158	C34H30O15	[M-H]-	Phenolic acids	86632-03-3
1-Linoleoylglycerol-2,3-di-O-glucoside	679.39	263.24	678.383	C33H58O14	[M+H]+	Lipids	-
2-Linoleoylglycerol-1,3-di-O-glucoside	679.39	263.24	678.383	C33H58O14	[M+H]+	Lipids	-
3-O-(2-O-Acetyl-glucosyl)oleanolic acid	675.41	397.14	679.419	C38H60O10	[M-H]-	Terpenoids	-
Pinoresinol-4,4'-O-di-O-glucoside	681.24	519.19	682.247	C32H42O16	[M-H]-	Lignans and Coumarins	63902-38-5
3,6'-Diferuloylsucrose	693.2	175.04	694.211	C32H38O17	[M-H]-	Phenolic acids	107172-40-7
PC(oxo-11:0/18:2)	702.46	184.07	701.46	C37H68NO9P	[M+H]+	Lipids	-
Quercetin-3-O-(2''-O-arabinosyl)rutinoside	743.2	303.05	742.195	C32H38O20	[M+H]+	Flavonoids	-
NADP (Nicotinamide adenine dinucleotide phosphate)	742.1	620.1	743.075	C21H28N7O17P3	[M-H]-	Nucleotides and derivatives	53-59-8
Kaempferol-3-O-rutinoside-7-O-glucoside	757.22	287.06	756.211	C33H40O20	[M+H]+	Flavonoids	-
Soyasaponin IV	767.46	441.37	766.45	C41H66O13	[M+H]+	Terpenoids	108906-97-4
Quercetin-3-O-rutinoside-7-O-glucoside	773.21	303.05	772.206	C33H40O21	[M+H]+	Flavonoids	-
Riboflavin 5'-Adenosine Diphosphate	784.15	437	785.157	C27H33N9O15P2	[M-H]-	Nucleotides and derivatives	146-14-5
Isorhamnetin-3-O-rutinoside-4'-O-glucoside*	787.23	317.06	786.221	C34H42O21	[M+H]+	Flavonoids	111393-97-6
Isorhamnetin-3-O-sophoroside-7-O-rhamnoside*	787.23	317.07	786.222	C34H42O21	[M+H]+	Flavonoids	41328-75-0
Echinacoside	785.25	623.2	786.258	C35H46O20	[M-H]-	Phenolic acids	82854-37-3
6-Hydroxykaempferol-3,7,6-O-triglycoside	789.21	303.1	788.201	C33H40O22	[M+H]+	Flavonoids	-
Soyasaponin III	797.47	441.37	796.461	C42H68O14	[M+H]+	Terpenoids	55304-02-4
Soyasaponin βb'	797.47	441.37	796.461	C42H68O14	[M+H]+	Terpenoids	-
Cistanoside A	799.27	161	800.274	C36H48O20	[M-H]-	Phenolic acids	93236-42-1
kaempferol-3-O-α-rhamnopyranosyl-(1→2)-[α-rhamnopyranosyl-(1→6)]-β-galactopyranoside-7-O-α-rhamnopyranoside	887.28	433.11	886.274	C39H50O23	[M+H]+	Flavonoids	-
Soyasaponin II	911.5	911.5	912.508	C47H76O17	[M-H]-	Terpenoids	55319-36-3
Soyasaponin βc	913.52	441.37	912.508	C47H76O17	[M+H]+	Terpenoids	-
Soyasaponin γg	923.5	423.36	922.493	C48H74O17	[M+H]+	Terpenoids	-
Dehydrosoyasaponin I	941.51	423.36	940.503	C48H76O18	[M+H]+	Terpenoids	117210-14-7
Soyasapogenol E-3-O-rhamnosyl(1,2)glucosyl(1,2)glucuronide	941.51	439.36	940.503	C48H76O18	[M+H]+	Terpenoids	-
Soyasaponin βe	941.51	439.35	940.503	C48H76O18	[M+H]+	Terpenoids	-
Soyasaponin βb (Soyasaponin I)	943.53	599.39	942.519	C48H78O18	[M+H]+	Terpenoids	-
Azukisaponin IV	973.5	471.35	972.493	C48H76O20	[M+H]+	Terpenoids	82793-04-2
Soyasaponin βα	1039.55	761.44	1038.54	C53H82O20	[M+H]+	Terpenoids	-
Hederagenin-3-O[rha(1-2)-ara]-28-O-[glc(1-6)glc]	1071.54	1011.52	1072.55	C53H84O22	[M-H]-	Terpenoids	-
