# Supplementary material for: Effects of exogenous calcium on flavonoid biosynthesis and accumulation in peanut roots under salt stress through multi-omics
Source: Front Nutr. 2024 Oct 30;11:1434170. doi: 10.3389/fnut.2024.1434170 (PMC11557398; doi:10.3389/fnut.2024.1434170)
Supplement: Supplementary file 2 [file Table_2.XLSX]

## Sheet: Sheet1
Table S2. Flavonoids in peanut roots treated for 48 hours identified by absolute quantitative metabolomics of flavonoids.
Compounds	Class	Q1 (Da)	Q3 (Da)	Molecular Weight	Ion mode	Ionization model	Formula
Hydroxysafflor yellow A	-	611.2	491.1	612.16904	Negative	[M-H]-	C27H32O16
Troxerutin	-	743.2	435.1	742.232035	Positive	[M+H]+	C33H42O19
Neohesperidin dihydrochalcone	Chalcones	611.2	303.1	612.205425	Negative	[M-H]-	C28H36O15
Benzylideneacetophenone	Chalcones	209.09	103.05	208.088815	Positive	[M+H]+	C15H12O
Naringenin chalcone	Chalcones	271.1	151	272.068475	Negative	[M-H]-	C15H12O5
Isoliquiritigenin	Chalcones	255.1	119.1	256.07356	Negative	[M-H]-	C15H12O4
(-)-Catechin	Flavanols	289.1	123	290.07904	Negative	[M-H]-	C15H14O6
(-)-Epicatechin	Flavanols	289.1	109	290.07904	Negative	[M-H]-	C15H14O6
(-)-Epigallocatechin	Flavanols	307.1	139	306.073955	Positive	[M+H]+	C15H14O7
Isosakuranin	Flavanones	447.1	285.1	448.13695	Negative	[M-H]-	C22H24O10
Narirutin	Flavanones	579.2	271.1	580.17921	Negative	[M-H]-	C27H32O14
Isosakuranetin	Flavanones	285.1	164	286.084125	Negative	[M-H]-	C16H14O5
Eriodictyol	Flavanones	287.1	135	288.06339	Negative	[M-H]-	C15H12O6
Naringenin-7-glucoside	Flavanones	433.1	271.1	434.1213	Negative	[M-H]-	C21H22O10
Pinocembrin	Flavanones	255.1	213.1	256.07356	Negative	[M-H]-	C15H12O4
Liquiritin	Flavanones	417.1	255.1	418.126385	Negative	[M-H]-	C21H22O9
Liquiritigenin	Flavanones	255.1	119.1	256.07356	Negative	[M-H]-	C15H12O4
Dihydrokaempferol	Flavanonols	287.1	125	288.06339	Negative	[M-H]-	C15H12O6
Dihydromyricetin	Flavanonols	319	193	320.05322	Negative	[M-H]-	C15H12O8
Taxifolin 7-O-rhamnoside	Flavanonols	449.1	285	450.116215	Negative	[M-H]-	C21H22O11
Vitexin	Flavone glycosides	431.1	311.1	432.10565	Negative	[M-H]-	C21H20O10
Isoorientin	Flavone glycosides	447.1	327.1	448.100565	Negative	[M-H]-	C21H20O11
Nicotiflorin	Flavones	593.2	285.1	594.158475	Negative	[M-H]-	C27H30O15
Chrysin	Flavones	253.1	143.1	254.05791	Negative	[M-H]-	C15H10O4
Narcissin	Flavones	623.2	315.1	624.16904	Negative	[M-H]-	C28H32O16
Jaceosidin	Flavones	329.1	299	330.073955	Negative	[M-H]-	C17H14O7
Homoplantaginin	Flavones	461.1	283	462.116215	Negative	[M-H]-	C22H22O11
Trimethylapigenin	Flavones	313.1	298.1	312.099775	Positive	[M+H]+	C18H16O5
7,4'-Dihydroxyflavone	Flavones	253.1	117	254.05791	Negative	[M-H]-	C15H10O4
Chrysosplenetin	Flavones	373.1	343	374.10017	Negative	[M-H]-	C19H18O8
Apigenin-7-glucuronide	Flavones	445.1	269.1	446.084915	Negative	[M-H]-	C21H18O11
Luteolin	Flavones	285	133	286.04774	Negative	[M-H]-	C15H10O6
5-O-Demethylnobiletin	Flavones	389.1	359.1	388.11582	Positive	[M+H]+	C20H20O8
Tangeretin	Flavones	373.1	343.1	372.120905	Positive	[M+H]+	C20H20O7
Apigenin	Flavones	269.1	117	270.052825	Negative	[M-H]-	C15H10O5
Baicalein	Flavones	271.1	123	270.052825	Positive	[M+H]+	C15H10O5
Scutellarein tetramethyl ether	Flavones	343.1	313.1	342.11034	Positive	[M+H]+	C19H18O6
Licoflavone A	Flavones	321.1	266.1	322.12051	Negative	[M-H]-	C20H18O4
Nobiletin	Flavones	403.1	388.1	402.13147	Positive	[M+H]+	C21H22O8
Hyperoside	Flavonols	465.1	314.9	464.09548	Positive	[M+H]+	C21H20O12
Avicularin	Flavonols	433.1	300	434.084915	Negative	[M-H]-	C20H18O11
Quercitrin	Flavonols	447.1	300	448.100565	Negative	[M-H]-	C21H20O11
Astragalin	Flavonols	447.1	284	448.100565	Negative	[M-H]-	C21H20O11
Tiliroside	Flavonols	593.1	285	594.137345	Negative	[M-H]-	C30H26O13
Spiraeoside	Flavonols	463.1	301	464.09548	Negative	[M-H]-	C21H20O12
3,7,4'-Trihydroxyflavone	Flavonols	271.1	137	270.052825	Positive	[M+H]+	C15H10O5
Rutin	Flavonols	609.1	300	610.15339	Negative	[M-H]-	C27H30O16
Isorhamnetin	Flavonols	315.1	300	316.058305	Negative	[M-H]-	C16H12O7
Kaempferol 3-neohesperidoside	Flavonols	593.2	284	594.158475	Negative	[M-H]-	C27H30O15
Formononetin	Isoflavanones	267.1	252.1	268.07356	Negative	[M-H]-	C16H12O4
Daidzin（Daidzein 7-O-glucoside）	Isoflavanones	415.1	252.1	416.110735	Negative	[M-H]-	C21H20O9
Neobavaisoflavone	Isoflavanones	321.1	265.1	322.12051	Negative	[M-H]-	C20H18O4
Licoisoflavone A	Isoflavanones	353.1	284	354.11034	Negative	[M-H]-	C20H18O6
Prunetin	Isoflavanones	283.1	268	284.068475	Negative	[M-H]-	C16H12O5
Puerarin	Isoflavanones	415.1	295.1	416.110735	Negative	[M-H]-	C21H20O9
2'-Hydroxygenistein	Isoflavanones	285	217.1	286.04774	Negative	[M-H]-	C15H10O6
7-Methoxyisoflavone	Isoflavanones	253.1	210.1	252.078645	Positive	[M+H]+	C16H12O3
Tectorigenin	Isoflavanones	299.1	240	300.06339	Negative	[M-H]-	C16H12O6
Glycitin（Glycitein_x005f_x005f_x005f_x005f_x005f_x005f_x005f_x0001_7-O-glucoside）	Isoflavanones	491.1	283.1	446.1213	Negative	[M-H]-	C22H22O10
Daidzein	Isoflavanones	253.1	224	254.05791	Negative	[M-H]-	C15H10O4
Genistein	Isoflavanones	269	133	270.052825	Negative	[M-H]-	C15H10O5
Syringaldehyde	Phenonic acids	181.1	151	182.05791	Negative	[M-H]-	C9H10O4
Isomangiferin	Xanthones	421.1	301	422.084915	Negative	[M-H]-	C19H18O11
Isobavachalcone	Chalcones	323.1	119.1	324.13616	Negative	[M-H]-	C20H20O4
(-)-Catechin gallate	Flavanols	441.1	169	442.09	Negative	[M-H]-	C22H18O10
3,4'-Dihydroxyflavone	Flavones	253.1	197.1	254.05791	Negative	[M-H]-	C15H10O4
Genistin	Isoflavanones	431.1	268	432.10565	Negative	[M-H]-	C21H20O10
Calycosin-7-O-β-D-glucoside	Isoflavanones	491.1	283.1	446.1213	Negative	[M-H]-	C22H22O10
