# Supplementary material for: Effects of exogenous calcium on flavonoid biosynthesis and accumulation in peanut roots under salt stress through multi-omics
Source: Front Nutr. 2024 Oct 30;11:1434170. doi: 10.3389/fnut.2024.1434170 (PMC11557398; doi:10.3389/fnut.2024.1434170)
Supplement: Supplementary file 3 [file Table_3.XLSX]

## Sheet: Sheet1
Table S3. Five flavonoids identified by UHPLC-MSMS during peanut germination.
Compounds	Class	Q1 (Da)	Q3 (Da)	Molecular Weight	Ion mode	Ionization model	Formula
Daidzein	Isoflavanones	253.1	224	254.05791	Negative	[M-H]-	C15H10O4
Liquiritigenin	Flavanones	255.1	119.1	256.07356	Negative	[M-H]-	C15H12O4
Formononetin	Isoflavanones	267.1	252.1	268.07356	Negative	[M-H]-	C16H12O4
Hyperoside	Flavonols	465.1	314.9	464.09548	Positive	[M+H]+	C21H20O12
Rutin	Flavonols	609.1	300	610.15339	Negative	[M-H]-	C27H30O16
