# Supplementary material for: Effects of exogenous calcium on flavonoid biosynthesis and accumulation in peanut roots under salt stress through multi-omics
Source: Front Nutr. 2024 Oct 30;11:1434170. doi: 10.3389/fnut.2024.1434170 (PMC11557398; doi:10.3389/fnut.2024.1434170)
Supplement: Supplementary file 4 [file Table_4.XLSX]

## Sheet: Sheet1
Table S5. Primer sequences for RT-qPCR of key enzyme genes in flavonoid biosynthesis
NO.	Enzyme	Gene ID (Arachis hypogaea)	Primer sequences(5'-3')
1		Actin-F	GATTGGAATGGAAGCTGCTG
		Actin-R	CGGTCAGCAATACCAGGGAA
2	AhCHI1	LOC112712326-F	TCATCTGGTTTTGTCCCTGAAT
		LOC112712326-R	GGAGGAACACAACTGGGGTAG
3	AhCHI2	LOC112777442-F	ATTTCCGGGCCGTTTGAGAA
		LOC112777442-R	CTAAGGCCCAAGTGTCCCAG
4	AhIFS1	LOC112791520-F	GTTGTGGGTCCTACCGGAAA
		LOC112791520-R	GTTGTTGCAGTGGACTTAGCA
5	AhIFS2	LOC112733554-F	AAACCCACGAAGCCACTTCT
		LOC112733554-R	GGCGTTGAGGAGATCGTTCA
6	AhUGT1	LOC112752001-F	AGAGTTGATGCTGATGAGAAAGGT
		LOC112752001-R	CCAATTTTGCCACAAACTCGGT
7	AhUGT2	LOC112754776-F	TGCAGAGTGAAGTTGTTTCCC
		LOC112754776-R	TCTTCATCACCGGAACACCA
8	AhUGT3	LOC112775566-F	GTTTCCAGCACAGGGACACA
		LOC112775566-R	TCTGATGTCCTTGCCAGCAT
9	AhUGT4	LOC112797634-F	ATTGCTGTGCCTCAATGGTC
		LOC112797634-R	AGTAGTGGTGGTTGGTTGGTT
